# Supplementary material for: Carvacrol, citral, eugenol and cinnamaldehyde casein based edible nanoemulsions as novel sustainable active coatings for fresh pork tenderloin meat preservation
Source: Frontiers journal article supplement (doi:10.3389/frfst.2024.1400224), 2024-06-20
Supplement: Data_Sheet_1.docx [file Data_Sheet_1.docx]

Supplementary Material

# Supplementary Data


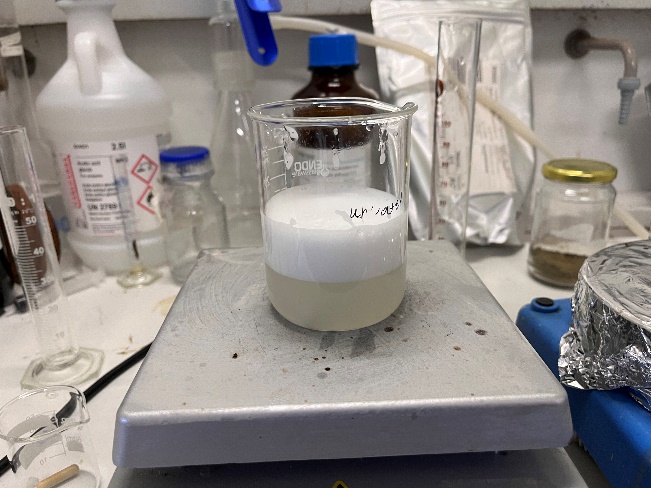


Supplementary Figure 1. NE formulations preparation


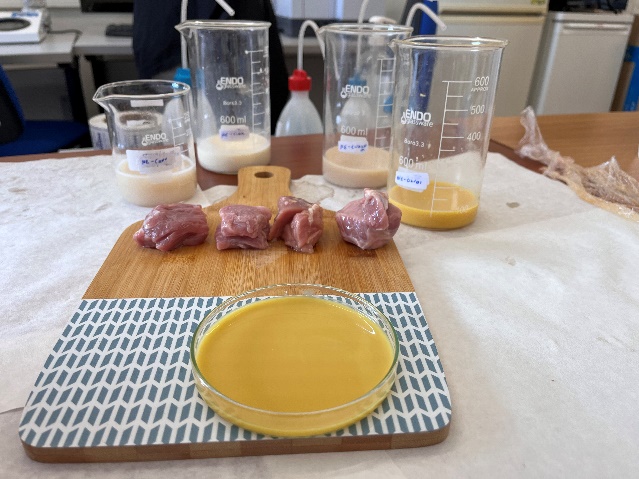


Supplementary Figure 2. NE coatings application on pork loin meat


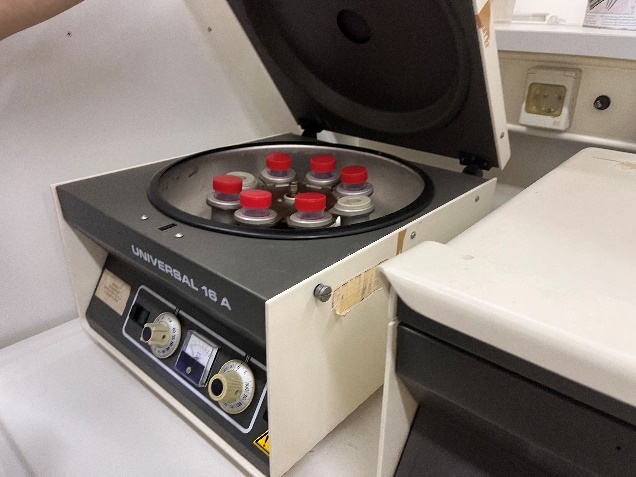


Supplementary Figure 3 Lipid oxidation – centrifugation of samples

Day 0

Day 3

Day 6

Day 9


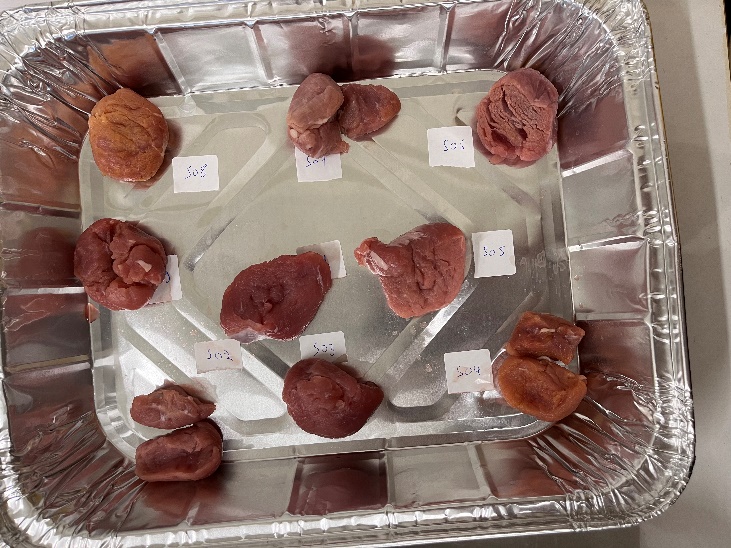

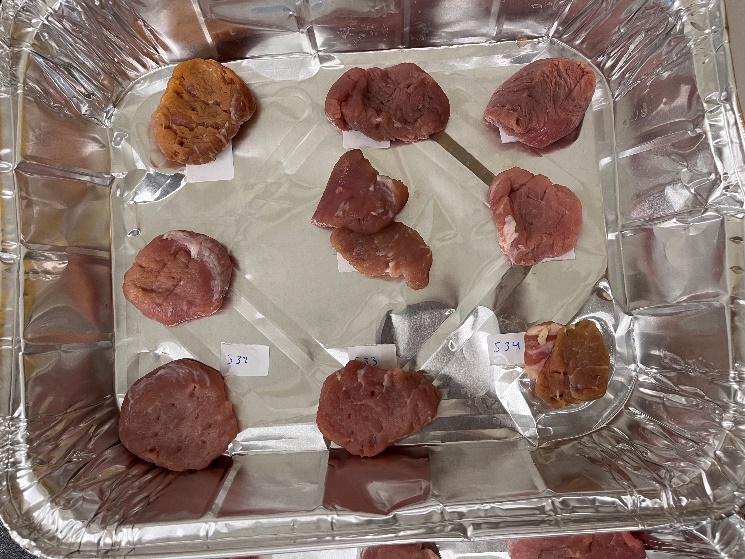

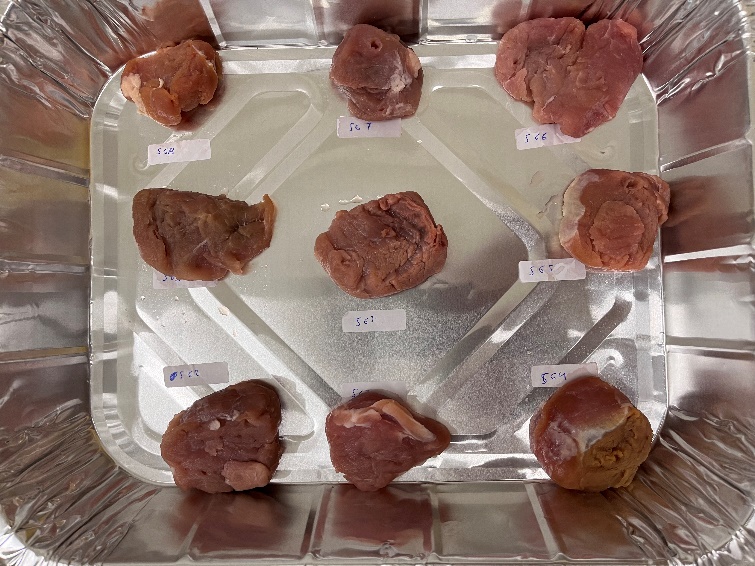

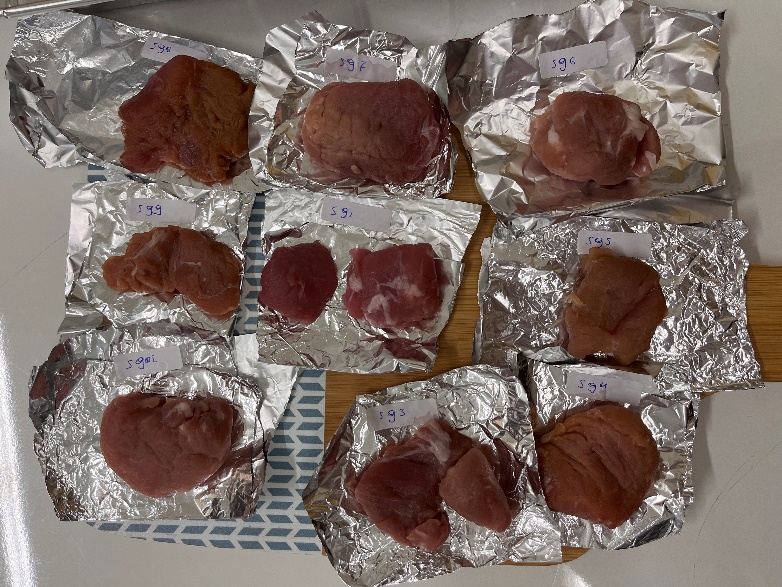


Supplementary Figure 4. Pork loin meat samples discolouration over 9 day period

**EC50**

Supplementary Table 1 EC50 pairwise comparisons of samples

| **Pairwise Comparisons of Samples** | | | | | |
| --- | --- | --- | --- | --- | --- |
| Sample 1-Sample 2 | Test Statistic | Std. Error | Std. Test Statistic | Sig. | Adj. Sig.a |
| NECA-NEEU | -3,000 | 5,774 | -,520 | ,603 | 1,000 |
| NECA-NECT | 6,000 | 5,774 | 1,039 | ,299 | 1,000 |
| NECA-NECI | -9,000 | 5,774 | -1,559 | ,119 | 1,000 |
| NECA-FCA | -12,000 | 5,774 | -2,078 | ,038 | 1,000 |
| NECA-FEU | -15,000 | 5,774 | -2,598 | ,009 | ,262 |
| NECA-FCT | -18,000 | 5,774 | -3,118 | ,002 | ,051 |
| NECA-FCIN | -21,000 | 5,774 | -3,637 | <,001 | ,008 |
| NEEU-NECT | 3,000 | 5,774 | ,520 | ,603 | 1,000 |
| NEEU-NECI | -6,000 | 5,774 | -1,039 | ,299 | 1,000 |
| NEEU-FCA | -9,000 | 5,774 | -1,559 | ,119 | 1,000 |
| NEEU-FEU | -12,000 | 5,774 | -2,078 | ,038 | 1,000 |
| NEEU-FCT | -15,000 | 5,774 | -2,598 | ,009 | ,262 |
| NEEU-FCIN | -18,000 | 5,774 | -3,118 | ,002 | ,051 |
| NECT-NECI | -3,000 | 5,774 | -,520 | ,603 | 1,000 |
| NECT-FCA | -6,000 | 5,774 | -1,039 | ,299 | 1,000 |
| NECT-FEU | -9,000 | 5,774 | -1,559 | ,119 | 1,000 |
| NECT-FCT | -12,000 | 5,774 | -2,078 | ,038 | 1,000 |
| NECT-FCIN | -15,000 | 5,774 | -2,598 | ,009 | ,262 |
| NECI-FCA | -3,000 | 5,774 | -,520 | ,603 | 1,000 |
| NECI-FEU | -6,000 | 5,774 | -1,039 | ,299 | 1,000 |
| NECI-FCT | -9,000 | 5,774 | -1,559 | ,119 | 1,000 |
| NECI-FCIN | -12,000 | 5,774 | -2,078 | ,038 | 1,000 |
| FCA-FEU | -3,000 | 5,774 | -,520 | ,603 | 1,000 |
| FCA-FCT | 6,000 | 5,774 | 1,039 | ,299 | 1,000 |
| FCA-FCIN | -9,000 | 5,774 | -1,559 | ,119 | 1,000 |
| FEU-FCT | 3,000 | 5,774 | ,520 | ,603 | 1,000 |
| FEU-FCIN | -6,000 | 5,774 | -1,039 | ,299 | 1,000 |
| FCT-FCIN | -3,000 | 5,774 | -,520 | ,603 | 1,000 |
| Each row tests the null hypothesis that the Sample 1 and Sample 2 distributions are the same.  Asymptotic significances (2-sided tests) are displayed. The significance level is ,050. | | | | | |
| a. Significance values have been adjusted by the Bonferroni correction for multiple tests. | | | | | |

## Well diffusion zone

**E.coli**

Supplementary Table 2 E.coli Well diffusion zone

| **Pairwise Comparisons of Treatment** | | | | | |
| --- | --- | --- | --- | --- | --- |
| Sample 1-Sample 2 | Test Statistic | Std. Error | Std. Test Statistic | Sig. |  |
| FCT-NECT | 3,000 | 5,771 | ,520 | ,603 |  |
| FCT-FCI | 6,000 | 5,771 | 1,040 | ,298 |  |
| FCT-NECI | 9,000 | 5,771 | 1,560 | ,119 |  |
| FCT-FEG | -12,000 | 5,771 | -2,079 | ,038 |  |
| FCT-FCA | 15,000 | 5,771 | 2,599 | ,009 |  |
| FCT-NEEU | 18,000 | 5,771 | 3,119 | ,002 |  |
| FCT-NECA | 21,000 | 5,771 | 3,639 | <,001 |  |
| NECT-FCI | -3,000 | 5,771 | -,520 | ,603 |  |
| NECT-NECI | 6,000 | 5,771 | 1,040 | ,298 |  |
| NECT-FEG | -9,000 | 5,771 | -1,560 | ,119 |  |
| NECT-FCA | -12,000 | 5,771 | -2,079 | ,038 |  |
| NECT-NEEU | -15,000 | 5,771 | -2,599 | ,009 |  |
| NECT-NECA | 18,000 | 5,771 | 3,119 | ,002 |  |
| FCI-NECI | 3,000 | 5,771 | ,520 | ,603 |  |
| FCI-FEG | -6,000 | 5,771 | -1,040 | ,298 |  |
| FCI-FCA | 9,000 | 5,771 | 1,560 | ,119 |  |
| FCI-NEEU | 12,000 | 5,771 | 2,079 | ,038 |  |
| FCI-NECA | 15,000 | 5,771 | 2,599 | ,009 |  |
| NECI-FEG | -3,000 | 5,771 | -,520 | ,603 |  |
| NECI-FCA | -6,000 | 5,771 | -1,040 | ,298 |  |
| NECI-NEEU | -9,000 | 5,771 | -1,560 | ,119 |  |
| NECI-NECA | 12,000 | 5,771 | 2,079 | ,038 |  |
| FEG-FCA | 3,000 | 5,771 | ,520 | ,603 |  |
| FEG-NEEU | 6,000 | 5,771 | 1,040 | ,298 |  |
| FEG-NECA | 9,000 | 5,771 | 1,560 | ,119 |  |
| FCA-NEEU | 3,000 | 5,771 | ,520 | ,603 |  |
| FCA-NECA | 6,000 | 5,771 | 1,040 | ,298 |  |
| NEEU-NECA | 3,000 | 5,771 | ,520 | ,603 |  |
| Each row tests the null hypothesis that the Sample 1 and Sample 2 distributions are the same.  Asymptotic significances (2-sided tests) are displayed. The significance level is ,050. | | | | | |
| a. Significance values have been adjusted by the Bonferroni correction for multiple tests. | | | | | |

*L. monocuytogenes*

Supplementary Table 3 L. monocuytogenes Well diffusion zone

| **Pairwise Comparisons of Treatment** | | | | | |
| --- | --- | --- | --- | --- | --- |
| Sample 1-Sample 2 | Test Statistic | Std. Error | Std. Test Statistic | Sig. | Adj. Sig.a |
| NECT-FCT | -3,000 | 5,770 | -,520 | ,603 | 1,000 |
| NECT-FCI | -6,000 | 5,770 | -1,040 | ,298 | 1,000 |
| NECT-NECI | 9,000 | 5,770 | 1,560 | ,119 | 1,000 |
| NECT-FEG | -12,000 | 5,770 | -2,080 | ,038 | 1,000 |
| NECT-FCA | -15,000 | 5,770 | -2,600 | ,009 | ,261 |
| NECT-NEEU | -18,000 | 5,770 | -3,120 | ,002 | ,051 |
| NECT-NECA | 21,000 | 5,770 | 3,640 | <,001 | ,008 |
| FCT-FCI | 3,000 | 5,770 | ,520 | ,603 | 1,000 |
| FCT-NECI | 6,000 | 5,770 | 1,040 | ,298 | 1,000 |
| FCT-FEG | -9,000 | 5,770 | -1,560 | ,119 | 1,000 |
| FCT-FCA | 12,000 | 5,770 | 2,080 | ,038 | 1,000 |
| FCT-NEEU | 15,000 | 5,770 | 2,600 | ,009 | ,261 |
| FCT-NECA | 18,000 | 5,770 | 3,120 | ,002 | ,051 |
| FCI-NECI | 3,000 | 5,770 | ,520 | ,603 | 1,000 |
| FCI-FEG | -6,000 | 5,770 | -1,040 | ,298 | 1,000 |
| FCI-FCA | 9,000 | 5,770 | 1,560 | ,119 | 1,000 |
| FCI-NEEU | 12,000 | 5,770 | 2,080 | ,038 | 1,000 |
| FCI-NECA | 15,000 | 5,770 | 2,600 | ,009 | ,261 |
| NECI-FEG | -3,000 | 5,770 | -,520 | ,603 | 1,000 |
| NECI-FCA | -6,000 | 5,770 | -1,040 | ,298 | 1,000 |
| NECI-NEEU | -9,000 | 5,770 | -1,560 | ,119 | 1,000 |
| NECI-NECA | 12,000 | 5,770 | 2,080 | ,038 | 1,000 |
| FEG-FCA | 3,000 | 5,770 | ,520 | ,603 | 1,000 |
| FEG-NEEU | 6,000 | 5,770 | 1,040 | ,298 | 1,000 |
| FEG-NECA | 9,000 | 5,770 | 1,560 | ,119 | 1,000 |
| FCA-NEEU | 3,000 | 5,770 | ,520 | ,603 | 1,000 |
| FCA-NECA | 6,000 | 5,770 | 1,040 | ,298 | 1,000 |
| NEEU-NECA | 3,000 | 5,770 | ,520 | ,603 | 1,000 |
| Each row tests the null hypothesis that the Sample 1 and Sample 2 distributions are the same.  Asymptotic significances (2-sided tests) are displayed. The significance level is ,050. | | | | | |
| a. Significance values have been adjusted by the Bonferroni correction for multiple tests. | | | | | |

## pH

Day 0

Supplementary Table 4 pH Day 0 Pairwise Comparisons of Treatment

| **Pairwise Comparisons of Treatment** | | | | | |
| --- | --- | --- | --- | --- | --- |
| Sample 1-Sample 2 | Test Statistic | Std. Error | Std. Test Statistic | Sig. | Adj. Sig.a |
| NECI-FCT | -5,667 | 6,400 | -,885 | ,376 | 1,000 |
| NECI-NECA | 6,667 | 6,400 | 1,042 | ,298 | 1,000 |
| NECI-FEG | -9,333 | 6,400 | -1,458 | ,145 | 1,000 |
| NECI-NEEU | -13,167 | 6,400 | -2,057 | ,040 | 1,000 |
| NECI-FCA | -13,167 | 6,400 | -2,057 | ,040 | 1,000 |
| NECI-FCI | -16,500 | 6,400 | -2,578 | ,010 | ,358 |
| NECI-NECT | -18,333 | 6,400 | -2,865 | ,004 | ,150 |
| NECI-Uncoated | -22,167 | 6,400 | -3,463 | <,001 | ,019 |
| FCT-NECA | 1,000 | 6,400 | ,156 | ,876 | 1,000 |
| FCT-FEG | -3,667 | 6,400 | -,573 | ,567 | 1,000 |
| FCT-NEEU | 7,500 | 6,400 | 1,172 | ,241 | 1,000 |
| FCT-FCA | 7,500 | 6,400 | 1,172 | ,241 | 1,000 |
| FCT-FCI | 10,833 | 6,400 | 1,693 | ,091 | 1,000 |
| FCT-NECT | 12,667 | 6,400 | 1,979 | ,048 | 1,000 |
| FCT-Uncoated | -16,500 | 6,400 | -2,578 | ,010 | ,358 |
| NECA-FEG | -2,667 | 6,400 | -,417 | ,677 | 1,000 |
| NECA-NEEU | -6,500 | 6,400 | -1,016 | ,310 | 1,000 |
| NECA-FCA | -6,500 | 6,400 | -1,016 | ,310 | 1,000 |
| NECA-FCI | -9,833 | 6,400 | -1,536 | ,124 | 1,000 |
| NECA-NECT | -11,667 | 6,400 | -1,823 | ,068 | 1,000 |
| NECA-Uncoated | -15,500 | 6,400 | -2,422 | ,015 | ,556 |
| FEG-NEEU | 3,833 | 6,400 | ,599 | ,549 | 1,000 |
| FEG-FCA | 3,833 | 6,400 | ,599 | ,549 | 1,000 |
| FEG-FCI | 7,167 | 6,400 | 1,120 | ,263 | 1,000 |
| FEG-NECT | 9,000 | 6,400 | 1,406 | ,160 | 1,000 |
| FEG-Uncoated | -12,833 | 6,400 | -2,005 | ,045 | 1,000 |
| NEEU-NECT | 5,167 | 6,400 | ,807 | ,420 | 1,000 |
| FCA-NECT | 5,167 | 6,400 | ,807 | ,420 | 1,000 |
| NEEU-Uncoated | -9,000 | 6,400 | -1,406 | ,160 | 1,000 |
| FCA-FCI | -3,333 | 6,400 | -,521 | ,602 | 1,000 |
| FCA-Uncoated | -9,000 | 6,400 | -1,406 | ,160 | 1,000 |
| NEEU-FCA | ,000 | 6,400 | ,000 | 1,000 | 1,000 |
| NEEU-FCI | -3,333 | 6,400 | -,521 | ,602 | 1,000 |
| FCI-NECT | 1,833 | 6,400 | ,286 | ,775 | 1,000 |
| FCI-Uncoated | -5,667 | 6,400 | -,885 | ,376 | 1,000 |
| NECT-Uncoated | -3,833 | 6,400 | -,599 | ,549 | 1,000 |
| Each row tests the null hypothesis that the Sample 1 and Sample 2 distributions are the same.  Asymptotic significances (2-sided tests) are displayed. The significance level is ,050. | | | | | |
| a. Significance values have been adjusted by the Bonferroni correction for multiple tests. | | | | | |

Day 3

Supplementary Table 5 pH Day 3 Pairwise Comparisons of Treatment

| **Pairwise Comparisons of Treatment** | | | | | |
| --- | --- | --- | --- | --- | --- |
| Sample 1-Sample 2 | Test Statistic | Std. Error | Std. Test Statistic | Sig. | Adj. Sig.a |
| NECA-NECT | -1,667 | 6,462 | -,258 | ,796 | 1,000 |
| NECA-NECI | -4,833 | 6,462 | -,748 | ,454 | 1,000 |
| NECA-FCT | -8,167 | 6,462 | -1,264 | ,206 | 1,000 |
| NECA-NEEU | -11,167 | 6,462 | -1,728 | ,084 | 1,000 |
| NECA-FEG | -14,167 | 6,462 | -2,192 | ,028 | 1,000 |
| NECA-FCA | -17,500 | 6,462 | -2,708 | ,007 | ,244 |
| NECA-FCI | -19,833 | 6,462 | -3,069 | ,002 | ,077 |
| NECA-Uncoated | -23,167 | 6,462 | -3,585 | <,001 | ,012 |
| NECT-NECI | 3,167 | 6,462 | ,490 | ,624 | 1,000 |
| NECT-FCT | -6,500 | 6,462 | -1,006 | ,314 | 1,000 |
| NECT-NEEU | -9,500 | 6,462 | -1,470 | ,142 | 1,000 |
| NECT-FEG | -12,500 | 6,462 | -1,934 | ,053 | 1,000 |
| NECT-FCA | -15,833 | 6,462 | -2,450 | ,014 | ,514 |
| NECT-FCI | -18,167 | 6,462 | -2,811 | ,005 | ,178 |
| NECT-Uncoated | -21,500 | 6,462 | -3,327 | <,001 | ,032 |
| NECI-FCT | -3,333 | 6,462 | -,516 | ,606 | 1,000 |
| NECI-NEEU | -6,333 | 6,462 | -,980 | ,327 | 1,000 |
| NECI-FEG | -9,333 | 6,462 | -1,444 | ,149 | 1,000 |
| NECI-FCA | -12,667 | 6,462 | -1,960 | ,050 | 1,000 |
| NECI-FCI | -15,000 | 6,462 | -2,321 | ,020 | ,730 |
| NECI-Uncoated | -18,333 | 6,462 | -2,837 | ,005 | ,164 |
| FCT-NEEU | 3,000 | 6,462 | ,464 | ,642 | 1,000 |
| FCT-FEG | -6,000 | 6,462 | -,929 | ,353 | 1,000 |
| FCT-FCA | 9,333 | 6,462 | 1,444 | ,149 | 1,000 |
| FCT-FCI | 11,667 | 6,462 | 1,805 | ,071 | 1,000 |
| FCT-Uncoated | -15,000 | 6,462 | -2,321 | ,020 | ,730 |
| NEEU-FEG | -3,000 | 6,462 | -,464 | ,642 | 1,000 |
| NEEU-FCA | -6,333 | 6,462 | -,980 | ,327 | 1,000 |
| NEEU-FCI | -8,667 | 6,462 | -1,341 | ,180 | 1,000 |
| NEEU-Uncoated | -12,000 | 6,462 | -1,857 | ,063 | 1,000 |
| FEG-FCA | 3,333 | 6,462 | ,516 | ,606 | 1,000 |
| FEG-FCI | 5,667 | 6,462 | ,877 | ,381 | 1,000 |
| FEG-Uncoated | -9,000 | 6,462 | -1,393 | ,164 | 1,000 |
| FCA-FCI | -2,333 | 6,462 | -,361 | ,718 | 1,000 |
| FCA-Uncoated | -5,667 | 6,462 | -,877 | ,381 | 1,000 |
| FCI-Uncoated | -3,333 | 6,462 | -,516 | ,606 | 1,000 |
| Each row tests the null hypothesis that the Sample 1 and Sample 2 distributions are the same.  Asymptotic significances (2-sided tests) are displayed. The significance level is ,050. | | | | | |
| a. Significance values have been adjusted by the Bonferroni correction for multiple tests. | | | | | |

**Day 6**

Supplementary Table 6 pH Day 6 Pairwise Comparisons of Treatment

| **Pairwise Comparisons of Treatment** | | | | | |
| --- | --- | --- | --- | --- | --- |
| Sample 1-Sample 2 | Test Statistic | Std. Error | Std. Test Statistic | Sig. | Adj. Sig.a |
| NECA-NECI | -3,000 | 6,470 | -,464 | ,643 | 1,000 |
| NECA-NECT | -6,000 | 6,470 | -,927 | ,354 | 1,000 |
| NECA-FCT | -9,833 | 6,470 | -1,520 | ,129 | 1,000 |
| NECA-NEEU | -11,167 | 6,470 | -1,726 | ,084 | 1,000 |
| NECA-FEG | -15,000 | 6,470 | -2,318 | ,020 | ,735 |
| NECA-FCA | -18,333 | 6,470 | -2,834 | ,005 | ,166 |
| NECA-FCI | -20,667 | 6,470 | -3,194 | ,001 | ,050 |
| NECA-Uncoated | -24,000 | 6,470 | -3,710 | <,001 | ,007 |
| NECI-NECT | -3,000 | 6,470 | -,464 | ,643 | 1,000 |
| NECI-FCT | -6,833 | 6,470 | -1,056 | ,291 | 1,000 |
| NECI-NEEU | -8,167 | 6,470 | -1,262 | ,207 | 1,000 |
| NECI-FEG | -12,000 | 6,470 | -1,855 | ,064 | 1,000 |
| NECI-FCA | -15,333 | 6,470 | -2,370 | ,018 | ,640 |
| NECI-FCI | -17,667 | 6,470 | -2,731 | ,006 | ,228 |
| NECI-Uncoated | -21,000 | 6,470 | -3,246 | ,001 | ,042 |
| NECT-FCT | -3,833 | 6,470 | -,592 | ,554 | 1,000 |
| NECT-NEEU | -5,167 | 6,470 | -,799 | ,425 | 1,000 |
| NECT-FEG | -9,000 | 6,470 | -1,391 | ,164 | 1,000 |
| NECT-FCA | -12,333 | 6,470 | -1,906 | ,057 | 1,000 |
| NECT-FCI | -14,667 | 6,470 | -2,267 | ,023 | ,842 |
| NECT-Uncoated | -18,000 | 6,470 | -2,782 | ,005 | ,194 |
| FCT-NEEU | 1,333 | 6,470 | ,206 | ,837 | 1,000 |
| FCT-FEG | -5,167 | 6,470 | -,799 | ,425 | 1,000 |
| FCT-FCA | 8,500 | 6,470 | 1,314 | ,189 | 1,000 |
| FCT-FCI | 10,833 | 6,470 | 1,674 | ,094 | 1,000 |
| FCT-Uncoated | -14,167 | 6,470 | -2,190 | ,029 | 1,000 |
| NEEU-FEG | -3,833 | 6,470 | -,592 | ,554 | 1,000 |
| NEEU-FCA | -7,167 | 6,470 | -1,108 | ,268 | 1,000 |
| NEEU-FCI | -9,500 | 6,470 | -1,468 | ,142 | 1,000 |
| NEEU-Uncoated | -12,833 | 6,470 | -1,984 | ,047 | 1,000 |
| FEG-FCA | 3,333 | 6,470 | ,515 | ,606 | 1,000 |
| FEG-FCI | 5,667 | 6,470 | ,876 | ,381 | 1,000 |
| FEG-Uncoated | -9,000 | 6,470 | -1,391 | ,164 | 1,000 |
| FCA-FCI | -2,333 | 6,470 | -,361 | ,718 | 1,000 |
| FCA-Uncoated | -5,667 | 6,470 | -,876 | ,381 | 1,000 |
| FCI-Uncoated | -3,333 | 6,470 | -,515 | ,606 | 1,000 |
| Each row tests the null hypothesis that the Sample 1 and Sample 2 distributions are the same.  Asymptotic significances (2-sided tests) are displayed. The significance level is ,050. | | | | | |
| a. Significance values have been adjusted by the Bonferroni correction for multiple tests. | | | | | |

Day 9

Supplementary Table 7 pH Day 9 Pairwise Comparisons of Treatment

| **Pairwise Comparisons of Treatment** | | | | | |
| --- | --- | --- | --- | --- | --- |
| Sample 1-Sample 2 | Test Statistic | Std. Error | Std. Test Statistic | Sig. | Adj. Sig.a |
| NECA-NECI | -3,333 | 6,460 | -,516 | ,606 | 1,000 |
| NECA-NECT | -5,667 | 6,460 | -,877 | ,380 | 1,000 |
| NECA-NEEU | -9,833 | 6,460 | -1,522 | ,128 | 1,000 |
| NECA-FCT | -11,167 | 6,460 | -1,729 | ,084 | 1,000 |
| NECA-FEG | -15,000 | 6,460 | -2,322 | ,020 | ,728 |
| NECA-FCA | -19,000 | 6,460 | -2,941 | ,003 | ,118 |
| NECA-FCI | -20,000 | 6,460 | -3,096 | ,002 | ,071 |
| NECA-Uncoated | -24,000 | 6,460 | -3,715 | <,001 | ,007 |
| NECI-NECT | -2,333 | 6,460 | -,361 | ,718 | 1,000 |
| NECI-NEEU | -6,500 | 6,460 | -1,006 | ,314 | 1,000 |
| NECI-FCT | -7,833 | 6,460 | -1,213 | ,225 | 1,000 |
| NECI-FEG | -11,667 | 6,460 | -1,806 | ,071 | 1,000 |
| NECI-FCA | -15,667 | 6,460 | -2,425 | ,015 | ,551 |
| NECI-FCI | -16,667 | 6,460 | -2,580 | ,010 | ,356 |
| NECI-Uncoated | -20,667 | 6,460 | -3,199 | ,001 | ,050 |
| NECT-NEEU | -4,167 | 6,460 | -,645 | ,519 | 1,000 |
| NECT-FCT | -5,500 | 6,460 | -,851 | ,395 | 1,000 |
| NECT-FEG | -9,333 | 6,460 | -1,445 | ,149 | 1,000 |
| NECT-FCA | -13,333 | 6,460 | -2,064 | ,039 | 1,000 |
| NECT-FCI | -14,333 | 6,460 | -2,219 | ,027 | ,954 |
| NECT-Uncoated | -18,333 | 6,460 | -2,838 | ,005 | ,163 |
| NEEU-FCT | -1,333 | 6,460 | -,206 | ,836 | 1,000 |
| NEEU-FEG | -5,167 | 6,460 | -,800 | ,424 | 1,000 |
| NEEU-FCA | -9,167 | 6,460 | -1,419 | ,156 | 1,000 |
| NEEU-FCI | -10,167 | 6,460 | -1,574 | ,116 | 1,000 |
| NEEU-Uncoated | -14,167 | 6,460 | -2,193 | ,028 | 1,000 |
| FCT-FEG | -3,833 | 6,460 | -,593 | ,553 | 1,000 |
| FCT-FCA | 7,833 | 6,460 | 1,213 | ,225 | 1,000 |
| FCT-FCI | 8,833 | 6,460 | 1,367 | ,171 | 1,000 |
| FCT-Uncoated | -12,833 | 6,460 | -1,987 | ,047 | 1,000 |
| FEG-FCA | 4,000 | 6,460 | ,619 | ,536 | 1,000 |
| FEG-FCI | 5,000 | 6,460 | ,774 | ,439 | 1,000 |
| FEG-Uncoated | -9,000 | 6,460 | -1,393 | ,164 | 1,000 |
| FCA-FCI | -1,000 | 6,460 | -,155 | ,877 | 1,000 |
| FCA-Uncoated | -5,000 | 6,460 | -,774 | ,439 | 1,000 |
| FCI-Uncoated | -4,000 | 6,460 | -,619 | ,536 | 1,000 |
| Each row tests the null hypothesis that the Sample 1 and Sample 2 distributions are the same.  Asymptotic significances (2-sided tests) are displayed. The significance level is ,050. | | | | | |
| a. Significance values have been adjusted by the Bonferroni correction for multiple tests. | | | | | |

## Lipid Oxidation

Supplementary Table 8 TBARS Day 3 Pairwise Comparisons of Treatment

| **Pairwise Comparisons of Treatment** | | | | | |
| --- | --- | --- | --- | --- | --- |
| Sample 1-Sample 2 | Test Statistic | Std. Error | Std. Test Statistic | Sig. | Adj. Sig.a |
| NECA-NEEU | -3,000 | 6,478 | -,463 | ,643 | 1,000 |
| NECA-NECT | -7,000 | 6,478 | -1,081 | ,280 | 1,000 |
| NECA-NECI | -9,833 | 6,478 | -1,518 | ,129 | 1,000 |
| NECA-FEG | -10,167 | 6,478 | -1,569 | ,117 | 1,000 |
| NECA-FCA | -15,000 | 6,478 | -2,316 | ,021 | ,741 |
| NECA-FCI | -18,000 | 6,478 | -2,779 | ,005 | ,196 |
| NECA-FCT | -21,000 | 6,478 | -3,242 | ,001 | ,043 |
| NECA-Uncoated | -24,000 | 6,478 | -3,705 | <,001 | ,008 |
| NEEU-NECT | 4,000 | 6,478 | ,617 | ,537 | 1,000 |
| NEEU-NECI | 6,833 | 6,478 | 1,055 | ,291 | 1,000 |
| NEEU-FEG | -7,167 | 6,478 | -1,106 | ,269 | 1,000 |
| NEEU-FCA | -12,000 | 6,478 | -1,852 | ,064 | 1,000 |
| NEEU-FCI | -15,000 | 6,478 | -2,316 | ,021 | ,741 |
| NEEU-FCT | -18,000 | 6,478 | -2,779 | ,005 | ,196 |
| NEEU-Uncoated | -21,000 | 6,478 | -3,242 | ,001 | ,043 |
| NECT-NECI | 2,833 | 6,478 | ,437 | ,662 | 1,000 |
| NECT-FEG | -3,167 | 6,478 | -,489 | ,625 | 1,000 |
| NECT-FCA | -8,000 | 6,478 | -1,235 | ,217 | 1,000 |
| NECT-FCI | -11,000 | 6,478 | -1,698 | ,089 | 1,000 |
| NECT-FCT | -14,000 | 6,478 | -2,161 | ,031 | 1,000 |
| NECT-Uncoated | -17,000 | 6,478 | -2,624 | ,009 | ,313 |
| NECI-FEG | -,333 | 6,478 | -,051 | ,959 | 1,000 |
| NECI-FCA | -5,167 | 6,478 | -,798 | ,425 | 1,000 |
| NECI-FCI | -8,167 | 6,478 | -1,261 | ,207 | 1,000 |
| NECI-FCT | -11,167 | 6,478 | -1,724 | ,085 | 1,000 |
| NECI-Uncoated | -14,167 | 6,478 | -2,187 | ,029 | 1,000 |
| FEG-FCA | 4,833 | 6,478 | ,746 | ,456 | 1,000 |
| FEG-FCI | 7,833 | 6,478 | 1,209 | ,227 | 1,000 |
| FEG-FCT | 10,833 | 6,478 | 1,672 | ,094 | 1,000 |
| FEG-Uncoated | -13,833 | 6,478 | -2,136 | ,033 | 1,000 |
| FCA-FCI | -3,000 | 6,478 | -,463 | ,643 | 1,000 |
| FCA-FCT | -6,000 | 6,478 | -,926 | ,354 | 1,000 |
| FCA-Uncoated | -9,000 | 6,478 | -1,389 | ,165 | 1,000 |
| FCI-FCT | -3,000 | 6,478 | -,463 | ,643 | 1,000 |
| FCI-Uncoated | -6,000 | 6,478 | -,926 | ,354 | 1,000 |
| FCT-Uncoated | -3,000 | 6,478 | -,463 | ,643 | 1,000 |
| Each row tests the null hypothesis that the Sample 1 and Sample 2 distributions are the same.  Asymptotic significances (2-sided tests) are displayed. The significance level is ,050. | | | | | |
| a. Significance values have been adjusted by the Bonferroni correction for multiple tests. | | | | | |

Supplementary Table 9 TBARS Day 6 Pairwise Comparisons of Treatment

| **Pairwise Comparisons of Treatment** | | | | | |
| --- | --- | --- | --- | --- | --- |
| Sample 1-Sample 2 | Test Statistic | Std. Error | Std. Test Statistic | Sig. | Adj. Sig.a |
| NECA-NEEU | -3,000 | 6,476 | -,463 | ,643 | 1,000 |
| NECA-NECT | -6,000 | 6,476 | -,927 | ,354 | 1,000 |
| NECA-FCA | -10,333 | 6,476 | -1,596 | ,111 | 1,000 |
| NECA-NECI | -10,667 | 6,476 | -1,647 | ,100 | 1,000 |
| NECA-FEG | -15,000 | 6,476 | -2,316 | ,021 | ,739 |
| NECA-FCT | -18,000 | 6,476 | -2,780 | ,005 | ,196 |
| NECA-FCI | -21,000 | 6,476 | -3,243 | ,001 | ,043 |
| NECA-Uncoated | -24,000 | 6,476 | -3,706 | <,001 | ,008 |
| NEEU-NECT | 3,000 | 6,476 | ,463 | ,643 | 1,000 |
| NEEU-FCA | -7,333 | 6,476 | -1,132 | ,257 | 1,000 |
| NEEU-NECI | 7,667 | 6,476 | 1,184 | ,236 | 1,000 |
| NEEU-FEG | -12,000 | 6,476 | -1,853 | ,064 | 1,000 |
| NEEU-FCT | -15,000 | 6,476 | -2,316 | ,021 | ,739 |
| NEEU-FCI | -18,000 | 6,476 | -2,780 | ,005 | ,196 |
| NEEU-Uncoated | -21,000 | 6,476 | -3,243 | ,001 | ,043 |
| NECT-FCA | -4,333 | 6,476 | -,669 | ,503 | 1,000 |
| NECT-NECI | 4,667 | 6,476 | ,721 | ,471 | 1,000 |
| NECT-FEG | -9,000 | 6,476 | -1,390 | ,165 | 1,000 |
| NECT-FCT | -12,000 | 6,476 | -1,853 | ,064 | 1,000 |
| NECT-FCI | -15,000 | 6,476 | -2,316 | ,021 | ,739 |
| NECT-Uncoated | -18,000 | 6,476 | -2,780 | ,005 | ,196 |
| FCA-NECI | ,333 | 6,476 | ,051 | ,959 | 1,000 |
| FCA-FEG | -4,667 | 6,476 | -,721 | ,471 | 1,000 |
| FCA-FCT | -7,667 | 6,476 | -1,184 | ,236 | 1,000 |
| FCA-FCI | -10,667 | 6,476 | -1,647 | ,100 | 1,000 |
| FCA-Uncoated | -13,667 | 6,476 | -2,110 | ,035 | 1,000 |
| NECI-FEG | -4,333 | 6,476 | -,669 | ,503 | 1,000 |
| NECI-FCT | -7,333 | 6,476 | -1,132 | ,257 | 1,000 |
| NECI-FCI | -10,333 | 6,476 | -1,596 | ,111 | 1,000 |
| NECI-Uncoated | -13,333 | 6,476 | -2,059 | ,039 | 1,000 |
| FEG-FCT | 3,000 | 6,476 | ,463 | ,643 | 1,000 |
| FEG-FCI | 6,000 | 6,476 | ,927 | ,354 | 1,000 |
| FEG-Uncoated | -9,000 | 6,476 | -1,390 | ,165 | 1,000 |
| FCT-FCI | 3,000 | 6,476 | ,463 | ,643 | 1,000 |
| FCT-Uncoated | -6,000 | 6,476 | -,927 | ,354 | 1,000 |
| FCI-Uncoated | -3,000 | 6,476 | -,463 | ,643 | 1,000 |
| Each row tests the null hypothesis that the Sample 1 and Sample 2 distributions are the same.  Asymptotic significances (2-sided tests) are displayed. The significance level is ,050. | | | | | |
| a. Significance values have been adjusted by the Bonferroni correction for multiple tests. | | | | | |

Supplementary Table 10 Pairwise Comparisons of Treatment

| **Pairwise Comparisons of Treatment** | | | | | |
| --- | --- | --- | --- | --- | --- |
| Sample 1-Sample 2 | Test Statistic | Std. Error | Std. Test Statistic | Sig. | Adj. Sig.a |
| NECA-NEEU | -3,000 | 6,476 | -,463 | ,643 | 1,000 |
| NECA-NECT | -6,000 | 6,476 | -,927 | ,354 | 1,000 |
| NECA-FCA | -10,333 | 6,476 | -1,596 | ,111 | 1,000 |
| NECA-NECI | -10,667 | 6,476 | -1,647 | ,100 | 1,000 |
| NECA-FEG | -15,000 | 6,476 | -2,316 | ,021 | ,739 |
| NECA-FCT | -18,000 | 6,476 | -2,780 | ,005 | ,196 |
| NECA-FCI | -21,000 | 6,476 | -3,243 | ,001 | ,043 |
| NECA-Uncoated | -24,000 | 6,476 | -3,706 | <,001 | ,008 |
| NEEU-NECT | 3,000 | 6,476 | ,463 | ,643 | 1,000 |
| NEEU-FCA | -7,333 | 6,476 | -1,132 | ,257 | 1,000 |
| NEEU-NECI | 7,667 | 6,476 | 1,184 | ,236 | 1,000 |
| NEEU-FEG | -12,000 | 6,476 | -1,853 | ,064 | 1,000 |
| NEEU-FCT | -15,000 | 6,476 | -2,316 | ,021 | ,739 |
| NEEU-FCI | -18,000 | 6,476 | -2,780 | ,005 | ,196 |
| NEEU-Uncoated | -21,000 | 6,476 | -3,243 | ,001 | ,043 |
| NECT-FCA | -4,333 | 6,476 | -,669 | ,503 | 1,000 |
| NECT-NECI | 4,667 | 6,476 | ,721 | ,471 | 1,000 |
| NECT-FEG | -9,000 | 6,476 | -1,390 | ,165 | 1,000 |
| NECT-FCT | -12,000 | 6,476 | -1,853 | ,064 | 1,000 |
| NECT-FCI | -15,000 | 6,476 | -2,316 | ,021 | ,739 |
| NECT-Uncoated | -18,000 | 6,476 | -2,780 | ,005 | ,196 |
| FCA-NECI | ,333 | 6,476 | ,051 | ,959 | 1,000 |
| FCA-FEG | -4,667 | 6,476 | -,721 | ,471 | 1,000 |
| FCA-FCT | -7,667 | 6,476 | -1,184 | ,236 | 1,000 |
| FCA-FCI | -10,667 | 6,476 | -1,647 | ,100 | 1,000 |
| FCA-Uncoated | -13,667 | 6,476 | -2,110 | ,035 | 1,000 |
| NECI-FEG | -4,333 | 6,476 | -,669 | ,503 | 1,000 |
| NECI-FCT | -7,333 | 6,476 | -1,132 | ,257 | 1,000 |
| NECI-FCI | -10,333 | 6,476 | -1,596 | ,111 | 1,000 |
| NECI-Uncoated | -13,333 | 6,476 | -2,059 | ,039 | 1,000 |
| FEG-FCT | 3,000 | 6,476 | ,463 | ,643 | 1,000 |
| FEG-FCI | 6,000 | 6,476 | ,927 | ,354 | 1,000 |
| FEG-Uncoated | -9,000 | 6,476 | -1,390 | ,165 | 1,000 |
| FCT-FCI | 3,000 | 6,476 | ,463 | ,643 | 1,000 |
| FCT-Uncoated | -6,000 | 6,476 | -,927 | ,354 | 1,000 |
| FCI-Uncoated | -3,000 | 6,476 | -,463 | ,643 | 1,000 |
| Each row tests the null hypothesis that the Sample 1 and Sample 2 distributions are the same.  Asymptotic significances (2-sided tests) are displayed. The significance level is ,050. | | | | | |
| a. Significance values have been adjusted by the Bonferroni correction for multiple tests. | | | | | |

## L*a*b*

L* Day 3

Supplementary Table 11 L* Day 3Pairwise Comparisons of Treatments

| **Pairwise Comparisons of Treatment** | | | | | |
| --- | --- | --- | --- | --- | --- |
| Sample 1-Sample 2 | Test Statistic | Std. Error | Std. Test Statistic | Sig. | Adj. Sig.a |
| Uncoated-NEEU | 6,333 | 6,480 | ,977 | ,328 | 1,000 |
| Uncoated-FEG | 8,333 | 6,480 | 1,286 | ,198 | 1,000 |
| Uncoated-NECT | 9,667 | 6,480 | 1,492 | ,136 | 1,000 |
| Uncoated-NECI | 10,333 | 6,480 | 1,595 | ,111 | 1,000 |
| Uncoated-NECA | 11,000 | 6,480 | 1,698 | ,090 | 1,000 |
| Uncoated-FCT | 15,000 | 6,480 | 2,315 | ,021 | ,742 |
| Uncoated-FCI | 20,000 | 6,480 | 3,087 | ,002 | ,073 |
| Uncoated-FCA | 21,333 | 6,480 | 3,292 | <,001 | ,036 |
| NEEU-FEG | -2,000 | 6,480 | -,309 | ,758 | 1,000 |
| NEEU-NECT | 3,333 | 6,480 | ,514 | ,607 | 1,000 |
| NEEU-NECI | 4,000 | 6,480 | ,617 | ,537 | 1,000 |
| NEEU-NECA | 4,667 | 6,480 | ,720 | ,471 | 1,000 |
| NEEU-FCT | -8,667 | 6,480 | -1,337 | ,181 | 1,000 |
| NEEU-FCI | -13,667 | 6,480 | -2,109 | ,035 | 1,000 |
| NEEU-FCA | -15,000 | 6,480 | -2,315 | ,021 | ,742 |
| FEG-NECT | 1,333 | 6,480 | ,206 | ,837 | 1,000 |
| FEG-NECI | 2,000 | 6,480 | ,309 | ,758 | 1,000 |
| FEG-NECA | 2,667 | 6,480 | ,412 | ,681 | 1,000 |
| FEG-FCT | 6,667 | 6,480 | 1,029 | ,304 | 1,000 |
| FEG-FCI | 11,667 | 6,480 | 1,800 | ,072 | 1,000 |
| FEG-FCA | 13,000 | 6,480 | 2,006 | ,045 | 1,000 |
| NECT-NECI | ,667 | 6,480 | ,103 | ,918 | 1,000 |
| NECT-NECA | 1,333 | 6,480 | ,206 | ,837 | 1,000 |
| NECT-FCT | -5,333 | 6,480 | -,823 | ,410 | 1,000 |
| NECT-FCI | -10,333 | 6,480 | -1,595 | ,111 | 1,000 |
| NECT-FCA | -11,667 | 6,480 | -1,800 | ,072 | 1,000 |
| NECI-NECA | ,667 | 6,480 | ,103 | ,918 | 1,000 |
| NECI-FCT | -4,667 | 6,480 | -,720 | ,471 | 1,000 |
| NECI-FCI | -9,667 | 6,480 | -1,492 | ,136 | 1,000 |
| NECI-FCA | -11,000 | 6,480 | -1,698 | ,090 | 1,000 |
| NECA-FCT | -4,000 | 6,480 | -,617 | ,537 | 1,000 |
| NECA-FCI | -9,000 | 6,480 | -1,389 | ,165 | 1,000 |
| NECA-FCA | -10,333 | 6,480 | -1,595 | ,111 | 1,000 |
| FCT-FCI | 5,000 | 6,480 | ,772 | ,440 | 1,000 |
| FCT-FCA | 6,333 | 6,480 | ,977 | ,328 | 1,000 |
| FCI-FCA | 1,333 | 6,480 | ,206 | ,837 | 1,000 |
| Each row tests the null hypothesis that the Sample 1 and Sample 2 distributions are the same.  Asymptotic significances (2-sided tests) are displayed. The significance level is ,050. | | | | | |
| a. Significance values have been adjusted by the Bonferroni correction for multiple tests. | | | | | |

L* Day 9

Supplementary Table 12 L* Day 9Pairwise Comparisons of Treatments

| **Pairwise Comparisons of Treatment** | | | | | |
| --- | --- | --- | --- | --- | --- |
| Sample 1-Sample 2 | Test Statistic | Std. Error | Std. Test Statistic | Sig. | Adj. Sig.a |
| Uncoated-FCT | 6,333 | 6,481 | ,977 | ,328 | 1,000 |
| Uncoated-FEG | 7,667 | 6,481 | 1,183 | ,237 | 1,000 |
| Uncoated-FCI | 8,333 | 6,481 | 1,286 | ,198 | 1,000 |
| Uncoated-NEEU | 11,667 | 6,481 | 1,800 | ,072 | 1,000 |
| Uncoated-NECT | 16,000 | 6,481 | 2,469 | ,014 | ,488 |
| Uncoated-NECI | 16,333 | 6,481 | 2,520 | ,012 | ,422 |
| Uncoated-NECA | 18,000 | 6,481 | 2,777 | ,005 | ,197 |
| Uncoated-FCA | 23,667 | 6,481 | 3,652 | <,001 | ,009 |
| FCT-FEG | -1,333 | 6,481 | -,206 | ,837 | 1,000 |
| FCT-FCI | 2,000 | 6,481 | ,309 | ,758 | 1,000 |
| FCT-NEEU | 5,333 | 6,481 | ,823 | ,411 | 1,000 |
| FCT-NECT | 9,667 | 6,481 | 1,492 | ,136 | 1,000 |
| FCT-NECI | 10,000 | 6,481 | 1,543 | ,123 | 1,000 |
| FCT-NECA | 11,667 | 6,481 | 1,800 | ,072 | 1,000 |
| FCT-FCA | 17,333 | 6,481 | 2,675 | ,007 | ,269 |
| FEG-FCI | ,667 | 6,481 | ,103 | ,918 | 1,000 |
| FEG-NEEU | 4,000 | 6,481 | ,617 | ,537 | 1,000 |
| FEG-NECT | 8,333 | 6,481 | 1,286 | ,198 | 1,000 |
| FEG-NECI | 8,667 | 6,481 | 1,337 | ,181 | 1,000 |
| FEG-NECA | 10,333 | 6,481 | 1,594 | ,111 | 1,000 |
| FEG-FCA | 16,000 | 6,481 | 2,469 | ,014 | ,488 |
| FCI-NEEU | 3,333 | 6,481 | ,514 | ,607 | 1,000 |
| FCI-NECT | 7,667 | 6,481 | 1,183 | ,237 | 1,000 |
| FCI-NECI | 8,000 | 6,481 | 1,234 | ,217 | 1,000 |
| FCI-NECA | 9,667 | 6,481 | 1,492 | ,136 | 1,000 |
| FCI-FCA | 15,333 | 6,481 | 2,366 | ,018 | ,647 |
| NEEU-NECT | 4,333 | 6,481 | ,669 | ,504 | 1,000 |
| NEEU-NECI | 4,667 | 6,481 | ,720 | ,471 | 1,000 |
| NEEU-NECA | 6,333 | 6,481 | ,977 | ,328 | 1,000 |
| NEEU-FCA | -12,000 | 6,481 | -1,852 | ,064 | 1,000 |
| NECT-NECI | ,333 | 6,481 | ,051 | ,959 | 1,000 |
| NECT-NECA | 2,000 | 6,481 | ,309 | ,758 | 1,000 |
| NECT-FCA | -7,667 | 6,481 | -1,183 | ,237 | 1,000 |
| NECI-NECA | 1,667 | 6,481 | ,257 | ,797 | 1,000 |
| NECI-FCA | -7,333 | 6,481 | -1,132 | ,258 | 1,000 |
| NECA-FCA | -5,667 | 6,481 | -,874 | ,382 | 1,000 |
| Each row tests the null hypothesis that the Sample 1 and Sample 2 distributions are the same.  Asymptotic significances (2-sided tests) are displayed. The significance level is ,050. | | | | | |
| a. Significance values have been adjusted by the Bonferroni correction for multiple tests. | | | | | |

a* Day 9

Supplementary Table 13 L* Day 9Pairwise Comparisons of Treatments

| **Pairwise Comparisons of Treatment** | | | | | |
| --- | --- | --- | --- | --- | --- |
| Sample 1-Sample 2 | Test Statistic | Std. Error | Std. Test Statistic | Sig. | Adj. Sig.a |
| Uncoated-NECA | 8,000 | 6,481 | 1,234 | ,217 | 1,000 |
| Uncoated-NECI | 8,333 | 6,481 | 1,286 | ,198 | 1,000 |
| Uncoated-NEEU | 8,333 | 6,481 | 1,286 | ,198 | 1,000 |
| Uncoated-FEG | 10,000 | 6,481 | 1,543 | ,123 | 1,000 |
| **Uncoated-FCA** | **10,667** | **6,481** | **1,646** | **,100** | 1,000 |
| Uncoated-NECT | 11,667 | 6,481 | 1,800 | ,072 | 1,000 |
| Uncoated-FCI | 19,667 | 6,481 | 3,035 | ,002 | ,087 |
| Uncoated-FCT | 22,333 | 6,481 | 3,446 | <,001 | ,020 |
| NECA-NEEU | -,333 | 6,481 | -,051 | ,959 | 1,000 |
| NECA-NECI | -,333 | 6,481 | -,051 | ,959 | 1,000 |
| NECA-FEG | -2,000 | 6,481 | -,309 | ,758 | 1,000 |
| NECA-FCA | -2,667 | 6,481 | -,411 | ,681 | 1,000 |
| NECA-NECT | -3,667 | 6,481 | -,566 | ,572 | 1,000 |
| NECA-FCI | -11,667 | 6,481 | -1,800 | ,072 | 1,000 |
| NECA-FCT | -14,333 | 6,481 | -2,212 | ,027 | ,972 |
| NECI-NEEU | ,000 | 6,481 | ,000 | 1,000 | 1,000 |
| NECI-FCA | -2,333 | 6,481 | -,360 | ,719 | 1,000 |
| NECI-NECT | -3,333 | 6,481 | -,514 | ,607 | 1,000 |
| NECI-FCI | -11,333 | 6,481 | -1,749 | ,080 | 1,000 |
| NEEU-FEG | -1,667 | 6,481 | -,257 | ,797 | 1,000 |
| NEEU-FCA | -2,333 | 6,481 | -,360 | ,719 | 1,000 |
| NEEU-NECT | 3,333 | 6,481 | ,514 | ,607 | 1,000 |
| NEEU-FCI | -11,333 | 6,481 | -1,749 | ,080 | 1,000 |
| NEEU-FCT | -14,000 | 6,481 | -2,160 | ,031 | 1,000 |
| NECI-FEG | -1,667 | 6,481 | -,257 | ,797 | 1,000 |
| NECI-FCT | -14,000 | 6,481 | -2,160 | ,031 | 1,000 |
| FEG-FCA | ,667 | 6,481 | ,103 | ,918 | 1,000 |
| FEG-NECT | 1,667 | 6,481 | ,257 | ,797 | 1,000 |
| FEG-FCI | 9,667 | 6,481 | 1,492 | ,136 | 1,000 |
| FEG-FCT | 12,333 | 6,481 | 1,903 | ,057 | 1,000 |
| FCA-NECT | 1,000 | 6,481 | ,154 | ,877 | 1,000 |
| FCA-FCI | -9,000 | 6,481 | -1,389 | ,165 | 1,000 |
| FCA-FCT | -11,667 | 6,481 | -1,800 | ,072 | 1,000 |
| NECT-FCI | -8,000 | 6,481 | -1,234 | ,217 | 1,000 |
| NECT-FCT | -10,667 | 6,481 | -1,646 | ,100 | 1,000 |
| FCI-FCT | -2,667 | 6,481 | -,411 | ,681 | 1,000 |
| Each row tests the null hypothesis that the Sample 1 and Sample 2 distributions are the same.  Asymptotic significances (2-sided tests) are displayed. The significance level is ,050. | | | | | |
| a. Significance values have been adjusted by the Bonferroni correction for multiple tests. | | | | | |

b* Day 3

Supplementary Table 14 b* day 3

| **Pairwise Comparisons of Treatment** | | | | | |
| --- | --- | --- | --- | --- | --- |
| Sample 1-Sample 2 | Test Statistic | Std. Error | Std. Test Statistic | Sig. | Adj. Sig.a |
| Uncoated-NEEU | 3,667 | 6,480 | ,566 | ,571 | 1,000 |
| Uncoated-NECT | 8,667 | 6,480 | 1,337 | ,181 | 1,000 |
| Uncoated-NECI | 10,000 | 6,480 | 1,543 | ,123 | 1,000 |
| Uncoated-NECA | 11,333 | 6,480 | 1,749 | ,080 | 1,000 |
| Uncoated-FEG | 12,000 | 6,480 | 1,852 | ,064 | 1,000 |
| Uncoated-FCI | 16,000 | 6,480 | 2,469 | ,014 | ,487 |
| Uncoated-FCA | 17,667 | 6,480 | 2,726 | ,006 | ,230 |
| Uncoated-FCT | 22,667 | 6,480 | 3,498 | <,001 | ,017 |
| NEEU-NECT | 5,000 | 6,480 | ,772 | ,440 | 1,000 |
| NEEU-NECI | 6,333 | 6,480 | ,977 | ,328 | 1,000 |
| NEEU-NECA | 7,667 | 6,480 | 1,183 | ,237 | 1,000 |
| NEEU-FEG | -8,333 | 6,480 | -1,286 | ,198 | 1,000 |
| NEEU-FCI | -12,333 | 6,480 | -1,903 | ,057 | 1,000 |
| NEEU-FCA | -14,000 | 6,480 | -2,161 | ,031 | 1,000 |
| NEEU-FCT | -19,000 | 6,480 | -2,932 | ,003 | ,121 |
| NECT-NECI | 1,333 | 6,480 | ,206 | ,837 | 1,000 |
| NECT-NECA | 2,667 | 6,480 | ,412 | ,681 | 1,000 |
| NECT-FEG | -3,333 | 6,480 | -,514 | ,607 | 1,000 |
| NECT-FCI | -7,333 | 6,480 | -1,132 | ,258 | 1,000 |
| NECT-FCA | -9,000 | 6,480 | -1,389 | ,165 | 1,000 |
| NECT-FCT | -14,000 | 6,480 | -2,161 | ,031 | 1,000 |
| NECI-NECA | 1,333 | 6,480 | ,206 | ,837 | 1,000 |
| NECI-FEG | -2,000 | 6,480 | -,309 | ,758 | 1,000 |
| NECI-FCI | -6,000 | 6,480 | -,926 | ,354 | 1,000 |
| NECI-FCA | -7,667 | 6,480 | -1,183 | ,237 | 1,000 |
| NECI-FCT | -12,667 | 6,480 | -1,955 | ,051 | 1,000 |
| NECA-FEG | -,667 | 6,480 | -,103 | ,918 | 1,000 |
| NECA-FCI | -4,667 | 6,480 | -,720 | ,471 | 1,000 |
| NECA-FCA | -6,333 | 6,480 | -,977 | ,328 | 1,000 |
| NECA-FCT | -11,333 | 6,480 | -1,749 | ,080 | 1,000 |
| FEG-FCI | 4,000 | 6,480 | ,617 | ,537 | 1,000 |
| FEG-FCA | 5,667 | 6,480 | ,875 | ,382 | 1,000 |
| FEG-FCT | 10,667 | 6,480 | 1,646 | ,100 | 1,000 |
| FCI-FCA | 1,667 | 6,480 | ,257 | ,797 | 1,000 |
| FCI-FCT | -6,667 | 6,480 | -1,029 | ,304 | 1,000 |
| FCA-FCT | -5,000 | 6,480 | -,772 | ,440 | 1,000 |
| Each row tests the null hypothesis that the Sample 1 and Sample 2 distributions are the same.  Asymptotic significances (2-sided tests) are displayed. The significance level is ,050. | | | | | |
| a. Significance values have been adjusted by the Bonferroni correction for multiple tests. | | | | | |

| **Pairwise Comparisons of Treatment** | | | | | |
| --- | --- | --- | --- | --- | --- |
| Sample 1-Sample 2 | Test Statistic | Std. Error | Std. Test Statistic | Sig. | Adj. Sig.a |
| FEG-Uncoated | -3,000 | 6,481 | -,463 | ,643 | 1,000 |
| FEG-FCA | 3,000 | 6,481 | ,463 | ,643 | 1,000 |
| FEG-NECI | 4,000 | 6,481 | ,617 | ,537 | 1,000 |
| FEG-NEEU | 4,333 | 6,481 | ,669 | ,504 | 1,000 |
| FEG-NECA | 10,000 | 6,481 | 1,543 | ,123 | 1,000 |
| FEG-FCI | 11,333 | 6,481 | 1,749 | ,080 | 1,000 |
| FEG-NECT | 13,667 | 6,481 | 2,109 | ,035 | 1,000 |
| FEG-FCT | 19,667 | 6,481 | 3,035 | ,002 | ,087 |
| FCA-FCI | -8,333 | 6,481 | -1,286 | ,198 | 1,000 |
| Uncoated-NEEU | 1,333 | 6,481 | ,206 | ,837 | 1,000 |
| FCA-NEEU | 1,333 | 6,481 | ,206 | ,837 | 1,000 |
| FCA-NECA | 7,000 | 6,481 | 1,080 | ,280 | 1,000 |
| Uncoated-NECI | 1,000 | 6,481 | ,154 | ,877 | 1,000 |
| Uncoated-NECA | 7,000 | 6,481 | 1,080 | ,280 | 1,000 |
| Uncoated-NECT | 10,667 | 6,481 | 1,646 | ,100 | 1,000 |
| FCA-Uncoated | ,000 | 6,481 | ,000 | 1,000 | 1,000 |
| FCA-NECI | 1,000 | 6,481 | ,154 | ,877 | 1,000 |
| FCA-NECT | 10,667 | 6,481 | 1,646 | ,100 | 1,000 |
| FCA-FCT | -16,667 | 6,481 | -2,572 | ,010 | ,364 |
| Uncoated-FCI | 8,333 | 6,481 | 1,286 | ,198 | 1,000 |
| Uncoated-FCT | 16,667 | 6,481 | 2,572 | ,010 | ,364 |
| NECI-NEEU | -,333 | 6,481 | -,051 | ,959 | 1,000 |
| NECI-NECA | 6,000 | 6,481 | ,926 | ,355 | 1,000 |
| NECI-FCI | -7,333 | 6,481 | -1,132 | ,258 | 1,000 |
| NECI-NECT | -9,667 | 6,481 | -1,492 | ,136 | 1,000 |
| NECI-FCT | -15,667 | 6,481 | -2,417 | ,016 | ,563 |
| NEEU-NECA | 5,667 | 6,481 | ,874 | ,382 | 1,000 |
| NEEU-FCI | -7,000 | 6,481 | -1,080 | ,280 | 1,000 |
| NEEU-NECT | 9,333 | 6,481 | 1,440 | ,150 | 1,000 |
| NEEU-FCT | -15,333 | 6,481 | -2,366 | ,018 | ,647 |
| NECA-FCI | -1,333 | 6,481 | -,206 | ,837 | 1,000 |
| NECA-NECT | -3,667 | 6,481 | -,566 | ,572 | 1,000 |
| NECA-FCT | -9,667 | 6,481 | -1,492 | ,136 | 1,000 |
| FCI-NECT | 2,333 | 6,481 | ,360 | ,719 | 1,000 |
| FCI-FCT | -8,333 | 6,481 | -1,286 | ,198 | 1,000 |
| NECT-FCT | -6,000 | 6,481 | -,926 | ,355 | 1,000 |
| Each row tests the null hypothesis that the Sample 1 and Sample 2 distributions are the same.  Asymptotic significances (2-sided tests) are displayed. The significance level is ,050. | | | | | |
| a. Significance values have been adjusted by the Bonferroni correction for multiple tests. | | | | | |

## TVC

Supplementary Table 15 TVC – Day 3 Pairwise Comparisons

| **Pairwise Comparisons of Treatment - Day 3** | | | | | |
| --- | --- | --- | --- | --- | --- |
| Sample 1-Sample 2 | Test Statistic | Std. Error | Std. Test Statistic | Sig. | Adj. Sig.a |
| NECA-NECI | -3,000 | 6,476 | -0,463 | 0,643 | 1,000 |
| NECA-NEEU | -6,000 | 6,476 | -0,927 | 0,354 | 1,000 |
| NECA-FCI | -9,000 | 6,476 | -1,390 | 0,165 | 1,000 |
| NECA-NECT | -12,000 | 6,476 | -1,853 | 0,064 | 1,000 |
| NECA-FEG | -15,000 | 6,476 | -2,316 | 0,021 | 0,739 |
| NECA-FCT | -18,000 | 6,476 | -2,780 | 0,005 | 0,196 |
| NECA-FCA | -21,000 | 6,476 | -3,243 | 0,001 | 0,043 |
| NECA-Uncoated | -24,000 | 6,476 | -3,706 | 0,000 | 0,008 |
| NECI-NEEU | -3,000 | 6,476 | -0,463 | 0,643 | 1,000 |
| NECI-FCI | -6,000 | 6,476 | -0,927 | 0,354 | 1,000 |
| NECI-NECT | -9,000 | 6,476 | -1,390 | 0,165 | 1,000 |
| NECI-FEG | -12,000 | 6,476 | -1,853 | 0,064 | 1,000 |
| NECI-FCT | -15,000 | 6,476 | -2,316 | 0,021 | 0,739 |
| NECI-FCA | -18,000 | 6,476 | -2,780 | 0,005 | 0,196 |
| NECI-Uncoated | -21,000 | 6,476 | -3,243 | 0,001 | 0,043 |
| NEEU-FCI | -3,000 | 6,476 | -0,463 | 0,643 | 1,000 |
| NEEU-NECT | 6,000 | 6,476 | 0,927 | 0,354 | 1,000 |
| NEEU-FEG | -9,000 | 6,476 | -1,390 | 0,165 | 1,000 |
| NEEU-FCT | -12,000 | 6,476 | -1,853 | 0,064 | 1,000 |
| NEEU-FCA | -15,000 | 6,476 | -2,316 | 0,021 | 0,739 |
| NEEU-Uncoated | -18,000 | 6,476 | -2,780 | 0,005 | 0,196 |
| FCI-NECT | 3,000 | 6,476 | 0,463 | 0,643 | 1,000 |
| FCI-FEG | -6,000 | 6,476 | -0,927 | 0,354 | 1,000 |
| FCI-FCT | -9,000 | 6,476 | -1,390 | 0,165 | 1,000 |
| FCI-FCA | 12,000 | 6,476 | 1,853 | 0,064 | 1,000 |
| FCI-Uncoated | -15,000 | 6,476 | -2,316 | 0,021 | 0,739 |
| NECT-FEG | -3,000 | 6,476 | -0,463 | 0,643 | 1,000 |
| NECT-FCT | -6,000 | 6,476 | -0,927 | 0,354 | 1,000 |
| NECT-FCA | -9,000 | 6,476 | -1,390 | 0,165 | 1,000 |
| NECT-Uncoated | -12,000 | 6,476 | -1,853 | 0,064 | 1,000 |
| FEG-FCT | 3,000 | 6,476 | 0,463 | 0,643 | 1,000 |
| FEG-FCA | 6,000 | 6,476 | 0,927 | 0,354 | 1,000 |
| FEG-Uncoated | -9,000 | 6,476 | -1,390 | 0,165 | 1,000 |
| FCT-FCA | 3,000 | 6,476 | 0,463 | 0,643 | 1,000 |
| FCT-Uncoated | -6,000 | 6,476 | -0,927 | 0,354 | 1,000 |
| FCA-Uncoated | -3,000 | 6,476 | -0,463 | 0,643 | 1,000 |
| Each row tests the null hypothesis that the Sample 1 and Sample 2 distributions are the same.  Asymptotic significances (2-sided tests) are displayed. The significance level is ,050. | | | | | |
| a. Significance values have been adjusted by the Bonferroni correction for multiple tests. | | | | | |

Supplementary Table 16 TVC - Day 6 Pairwise Comparisons of Treatment

| **Pairwise Comparisons of Treatment - Day 6** | | | | | |
| --- | --- | --- | --- | --- | --- |
| Sample 1-Sample 2 | Test Statistic | Std. Error | Std. Test Statistic | Sig. | Adj. Sig.a |
| NECA-NEEU | -3,000 | 6,475 | -0,463 | 0,643 | 1,000 |
| NECA-NECT | -6,000 | 6,475 | -0,927 | 0,354 | 1,000 |
| NECA-NECI | -9,000 | 6,475 | -1,390 | 0,165 | 1,000 |
| NECA-FCA | -12,000 | 6,475 | -1,853 | 0,064 | 1,000 |
| NECA-FEG | -15,000 | 6,475 | -2,317 | 0,021 | 0,739 |
| NECA-FCI | -18,000 | 6,475 | -2,780 | 0,005 | 0,196 |
| NECA-FCT | -21,000 | 6,475 | -3,243 | 0,001 | 0,043 |
| NECA-Uncoated | -24,000 | 6,475 | -3,707 | 0,000 | 0,008 |
| NEEU-NECT | 3,000 | 6,475 | 0,463 | 0,643 | 1,000 |
| NEEU-NECI | 6,000 | 6,475 | 0,927 | 0,354 | 1,000 |
| NEEU-FCA | -9,000 | 6,475 | -1,390 | 0,165 | 1,000 |
| NEEU-FEG | -12,000 | 6,475 | -1,853 | 0,064 | 1,000 |
| NEEU-FCI | -15,000 | 6,475 | -2,317 | 0,021 | 0,739 |
| NEEU-FCT | -18,000 | 6,475 | -2,780 | 0,005 | 0,196 |
| NEEU-Uncoated | -21,000 | 6,475 | -3,243 | 0,001 | 0,043 |
| NECT-NECI | 3,000 | 6,475 | 0,463 | 0,643 | 1,000 |
| NECT-FCA | -6,000 | 6,475 | -0,927 | 0,354 | 1,000 |
| NECT-FEG | -9,000 | 6,475 | -1,390 | 0,165 | 1,000 |
| NECT-FCI | -12,000 | 6,475 | -1,853 | 0,064 | 1,000 |
| NECT-FCT | -15,000 | 6,475 | -2,317 | 0,021 | 0,739 |
| NECT-Uncoated | -18,000 | 6,475 | -2,780 | 0,005 | 0,196 |
| NECI-FCA | -3,000 | 6,475 | -0,463 | 0,643 | 1,000 |
| NECI-FEG | -6,000 | 6,475 | -0,927 | 0,354 | 1,000 |
| NECI-FCI | -9,000 | 6,475 | -1,390 | 0,165 | 1,000 |
| NECI-FCT | -12,000 | 6,475 | -1,853 | 0,064 | 1,000 |
| NECI-Uncoated | -15,000 | 6,475 | -2,317 | 0,021 | 0,739 |
| FCA-FEG | -3,000 | 6,475 | -0,463 | 0,643 | 1,000 |
| FCA-FCI | -6,000 | 6,475 | -0,927 | 0,354 | 1,000 |
| FCA-FCT | -9,000 | 6,475 | -1,390 | 0,165 | 1,000 |
| FCA-Uncoated | -12,000 | 6,475 | -1,853 | 0,064 | 1,000 |
| FEG-FCI | 3,000 | 6,475 | 0,463 | 0,643 | 1,000 |
| FEG-FCT | 6,000 | 6,475 | 0,927 | 0,354 | 1,000 |
| FEG-Uncoated | -9,000 | 6,475 | -1,390 | 0,165 | 1,000 |
| FCI-FCT | -3,000 | 6,475 | -0,463 | 0,643 | 1,000 |
| FCI-Uncoated | -6,000 | 6,475 | -0,927 | 0,354 | 1,000 |
| FCT-Uncoated | -3,000 | 6,475 | -0,463 | 0,643 | 1,000 |
| Each row tests the null hypothesis that the Sample 1 and Sample 2 distributions are the same.  Asymptotic significances (2-sided tests) are displayed. The significance level is ,050. | | | | | |
| a. Significance values have been adjusted by the Bonferroni correction for multiple tests. | | | | | |

| **Pairwise Comparisons of Treatment - Day 9** | | | | | |
| --- | --- | --- | --- | --- | --- |
| Sample 1-Sample 2 | Test Statistic | Std. Error | Std. Test Statistic | Sig. | Adj. Sig.a |
| NECA-NEEU | -3,000 | 6,474 | -0,463 | 0,643 | 1,000 |
| NECA-NECT | -6,000 | 6,474 | -0,927 | 0,354 | 1,000 |
| NECA-NECI | -9,000 | 6,474 | -1,390 | 0,164 | 1,000 |
| NECA-FCA | -12,000 | 6,474 | -1,854 | 0,064 | 1,000 |
| NECA-FEG | -15,000 | 6,474 | -2,317 | 0,021 | 0,738 |
| NECA-FCT | -18,000 | 6,474 | -2,780 | 0,005 | 0,195 |
| NECA-FCI | -21,000 | 6,474 | -3,244 | 0,001 | 0,042 |
| NECA-Uncoated | -24,000 | 6,474 | -3,707 | 0,000 | 0,008 |
| NEEU-NECT | 3,000 | 6,474 | 0,463 | 0,643 | 1,000 |
| NEEU-NECI | 6,000 | 6,474 | 0,927 | 0,354 | 1,000 |
| NEEU-FCA | -9,000 | 6,474 | -1,390 | 0,164 | 1,000 |
| NEEU-FEG | -12,000 | 6,474 | -1,854 | 0,064 | 1,000 |
| NEEU-FCT | -15,000 | 6,474 | -2,317 | 0,021 | 0,738 |
| NEEU-FCI | -18,000 | 6,474 | -2,780 | 0,005 | 0,195 |
| NEEU-Uncoated | -21,000 | 6,474 | -3,244 | 0,001 | 0,042 |
| NECT-NECI | 3,000 | 6,474 | 0,463 | 0,643 | 1,000 |
| NECT-FCA | -6,000 | 6,474 | -0,927 | 0,354 | 1,000 |
| NECT-FEG | -9,000 | 6,474 | -1,390 | 0,164 | 1,000 |
| NECT-FCT | -12,000 | 6,474 | -1,854 | 0,064 | 1,000 |
| NECT-FCI | -15,000 | 6,474 | -2,317 | 0,021 | 0,738 |
| NECT-Uncoated | -18,000 | 6,474 | -2,780 | 0,005 | 0,195 |
| NECI-FCA | -3,000 | 6,474 | -0,463 | 0,643 | 1,000 |
| NECI-FEG | -6,000 | 6,474 | -0,927 | 0,354 | 1,000 |
| NECI-FCT | -9,000 | 6,474 | -1,390 | 0,164 | 1,000 |
| NECI-FCI | -12,000 | 6,474 | -1,854 | 0,064 | 1,000 |
| NECI-Uncoated | -15,000 | 6,474 | -2,317 | 0,021 | 0,738 |
| FCA-FEG | -3,000 | 6,474 | -0,463 | 0,643 | 1,000 |
| FCA-FCT | -6,000 | 6,474 | -0,927 | 0,354 | 1,000 |
| FCA-FCI | -9,000 | 6,474 | -1,390 | 0,164 | 1,000 |
| FCA-Uncoated | -12,000 | 6,474 | -1,854 | 0,064 | 1,000 |
| FEG-FCT | 3,000 | 6,474 | 0,463 | 0,643 | 1,000 |
| FEG-FCI | 6,000 | 6,474 | 0,927 | 0,354 | 1,000 |
| FEG-Uncoated | -9,000 | 6,474 | -1,390 | 0,164 | 1,000 |
| FCT-FCI | 3,000 | 6,474 | 0,463 | 0,643 | 1,000 |
| FCT-Uncoated | -6,000 | 6,474 | -0,927 | 0,354 | 1,000 |
| FCI-Uncoated | -3,000 | 6,474 | -0,463 | 0,643 | 1,000 |
| Each row tests the null hypothesis that the Sample 1 and Sample 2 distributions are the same.  Asymptotic significances (2-sided tests) are displayed. The significance level is ,050. | | | | | |
| a. Significance values have been adjusted by the Bonferroni correction for multiple tests. | | | | | |

Supplementary Table 17 Tuckey HSD pairwise comparison among treatments

| **Multiple Comparisons** | | | | | | | |
| --- | --- | --- | --- | --- | --- | --- | --- |
| Tukey HSD | | | | | | | |
| Dependent Variable | (I) Treatment | (J) Treatment | Mean Difference (I-J) | Std. Error | Sig. | 95% Confidence Interval | |
| Lower Bound | Upper Bound |
| Results_Appearence | NECA | NECI | ,02857 | ,054433 | 1,000 | -,14258 | ,19972 |
| NECT | ,17143* | ,054433 | ,049 | ,00028 | ,34258 |
| NEEU | ,15238 | ,054433 | ,124 | -,01877 | ,32353 |
| FCA | ,32857* | ,054433 | <,001 | ,15742 | ,49972 |
| FCI | ,25714* | ,054433 | <,001 | ,08599 | ,42829 |
| FCT | ,31429* | ,054433 | <,001 | ,14314 | ,48543 |
| FEU | ,28571* | ,054433 | <,001 | ,11457 | ,45686 |
| Uncoated | 1,10952* | ,054433 | <,001 | ,93838 | 1,28067 |
| NECI | NECA | -,02857 | ,054433 | 1,000 | -,19972 | ,14258 |
| NECT | ,14286 | ,054433 | ,185 | -,02829 | ,31401 |
| NEEU | ,12381 | ,054433 | ,364 | -,04734 | ,29496 |
| FCA | ,30000* | ,054433 | <,001 | ,12885 | ,47115 |
| FCI | ,22857* | ,054433 | ,001 | ,05742 | ,39972 |
| FCT | ,28571* | ,054433 | <,001 | ,11457 | ,45686 |
| FEU | ,25714* | ,054433 | <,001 | ,08599 | ,42829 |
| Uncoated | 1,08095* | ,054433 | <,001 | ,90980 | 1,25210 |
| NECT | NECA | -,17143* | ,054433 | ,049 | -,34258 | -,00028 |
| NECI | -,14286 | ,054433 | ,185 | -,31401 | ,02829 |
| NEEU | -,01905 | ,054433 | 1,000 | -,19020 | ,15210 |
| FCA | ,15714 | ,054433 | ,100 | -,01401 | ,32829 |
| FCI | ,08571 | ,054433 | ,817 | -,08543 | ,25686 |
| FCT | ,14286 | ,054433 | ,185 | -,02829 | ,31401 |
| FEU | ,11429 | ,054433 | ,477 | -,05686 | ,28543 |
| Uncoated | ,93810* | ,054433 | <,001 | ,76695 | 1,10924 |
| NEEU | NECA | -,15238 | ,054433 | ,124 | -,32353 | ,01877 |
| NECI | -,12381 | ,054433 | ,364 | -,29496 | ,04734 |
| NECT | ,01905 | ,054433 | 1,000 | -,15210 | ,19020 |
| FCA | ,17619* | ,054433 | ,038 | ,00504 | ,34734 |
| FCI | ,10476 | ,054433 | ,598 | -,06639 | ,27591 |
| FCT | ,16190 | ,054433 | ,080 | -,00924 | ,33305 |
| FEU | ,13333 | ,054433 | ,265 | -,03782 | ,30448 |
| Uncoated | ,95714* | ,054433 | <,001 | ,78599 | 1,12829 |
| FCA | NECA | -,32857* | ,054433 | <,001 | -,49972 | -,15742 |
| NECI | -,30000* | ,054433 | <,001 | -,47115 | -,12885 |
| NECT | -,15714 | ,054433 | ,100 | -,32829 | ,01401 |
| NEEU | -,17619* | ,054433 | ,038 | -,34734 | -,00504 |
| FCI | -,07143 | ,054433 | ,926 | -,24258 | ,09972 |
| FCT | -,01429 | ,054433 | 1,000 | -,18543 | ,15686 |
| FEU | -,04286 | ,054433 | ,997 | -,21401 | ,12829 |
| Uncoated | ,78095* | ,054433 | <,001 | ,60980 | ,95210 |
| FCI | NECA | -,25714* | ,054433 | <,001 | -,42829 | -,08599 |
| NECI | -,22857* | ,054433 | ,001 | -,39972 | -,05742 |
| NECT | -,08571 | ,054433 | ,817 | -,25686 | ,08543 |
| NEEU | -,10476 | ,054433 | ,598 | -,27591 | ,06639 |
| FCA | ,07143 | ,054433 | ,926 | -,09972 | ,24258 |
| FCT | ,05714 | ,054433 | ,980 | -,11401 | ,22829 |
| FEU | ,02857 | ,054433 | 1,000 | -,14258 | ,19972 |
| Uncoated | ,85238* | ,054433 | <,001 | ,68123 | 1,02353 |
| FCT | NECA | -,31429* | ,054433 | <,001 | -,48543 | -,14314 |
| NECI | -,28571* | ,054433 | <,001 | -,45686 | -,11457 |
| NECT | -,14286 | ,054433 | ,185 | -,31401 | ,02829 |
| NEEU | -,16190 | ,054433 | ,080 | -,33305 | ,00924 |
| FCA | ,01429 | ,054433 | 1,000 | -,15686 | ,18543 |
| FCI | -,05714 | ,054433 | ,980 | -,22829 | ,11401 |
| FEU | -,02857 | ,054433 | 1,000 | -,19972 | ,14258 |
| Uncoated | ,79524* | ,054433 | <,001 | ,62409 | ,96639 |
| FEU | NECA | -,28571* | ,054433 | <,001 | -,45686 | -,11457 |
| NECI | -,25714* | ,054433 | <,001 | -,42829 | -,08599 |
| NECT | -,11429 | ,054433 | ,477 | -,28543 | ,05686 |
| NEEU | -,13333 | ,054433 | ,265 | -,30448 | ,03782 |
| FCA | ,04286 | ,054433 | ,997 | -,12829 | ,21401 |
| FCI | -,02857 | ,054433 | 1,000 | -,19972 | ,14258 |
| FCT | ,02857 | ,054433 | 1,000 | -,14258 | ,19972 |
| Uncoated | ,82381* | ,054433 | <,001 | ,65266 | ,99496 |
| Uncoated | NECA | -1,10952* | ,054433 | <,001 | -1,28067 | -,93838 |
| NECI | -1,08095* | ,054433 | <,001 | -1,25210 | -,90980 |
| NECT | -,93810* | ,054433 | <,001 | -1,10924 | -,76695 |
| NEEU | -,95714* | ,054433 | <,001 | -1,12829 | -,78599 |
| FCA | -,78095* | ,054433 | <,001 | -,95210 | -,60980 |
| FCI | -,85238* | ,054433 | <,001 | -1,02353 | -,68123 |
| FCT | -,79524* | ,054433 | <,001 | -,96639 | -,62409 |
| FEU | -,82381* | ,054433 | <,001 | -,99496 | -,65266 |
| Results_Odor | NECA | NECI | ,0429 | ,03856 | ,972 | -,0784 | ,1641 |
| NECT | ,0095 | ,03856 | 1,000 | -,1117 | ,1307 |
| NEEU | ,0333 | ,03856 | ,994 | -,0879 | ,1546 |
| FCA | ,1810* | ,03856 | <,001 | ,0597 | ,3022 |
| FCI | ,2810* | ,03856 | <,001 | ,1597 | ,4022 |
| FCT | ,3238* | ,03856 | <,001 | ,2026 | ,4450 |
| FEU | ,2762* | ,03856 | <,001 | ,1550 | ,3974 |
| Uncoated | 1,0381* | ,03856 | <,001 | ,9169 | 1,1593 |
| NECI | NECA | -,0429 | ,03856 | ,972 | -,1641 | ,0784 |
| NECT | -,0333 | ,03856 | ,994 | -,1546 | ,0879 |
| NEEU | -,0095 | ,03856 | 1,000 | -,1307 | ,1117 |
| FCA | ,1381* | ,03856 | ,013 | ,0169 | ,2593 |
| FCI | ,2381* | ,03856 | <,001 | ,1169 | ,3593 |
| FCT | ,2810* | ,03856 | <,001 | ,1597 | ,4022 |
| FEU | ,2333* | ,03856 | <,001 | ,1121 | ,3546 |
| Uncoated | ,9952* | ,03856 | <,001 | ,8740 | 1,1165 |
| NECT | NECA | -,0095 | ,03856 | 1,000 | -,1307 | ,1117 |
| NECI | ,0333 | ,03856 | ,994 | -,0879 | ,1546 |
| NEEU | ,0238 | ,03856 | ,999 | -,0974 | ,1450 |
| FCA | ,1714* | ,03856 | <,001 | ,0502 | ,2927 |
| FCI | ,2714* | ,03856 | <,001 | ,1502 | ,3927 |
| FCT | ,3143* | ,03856 | <,001 | ,1931 | ,4355 |
| FEU | ,2667* | ,03856 | <,001 | ,1454 | ,3879 |
| Uncoated | 1,0286* | ,03856 | <,001 | ,9073 | 1,1498 |
| NEEU | NECA | -,0333 | ,03856 | ,994 | -,1546 | ,0879 |
| NECI | ,0095 | ,03856 | 1,000 | -,1117 | ,1307 |
| NECT | -,0238 | ,03856 | ,999 | -,1450 | ,0974 |
| FCA | ,1476* | ,03856 | ,006 | ,0264 | ,2688 |
| FCI | ,2476* | ,03856 | <,001 | ,1264 | ,3688 |
| FCT | ,2905* | ,03856 | <,001 | ,1693 | ,4117 |
| FEU | ,2429* | ,03856 | <,001 | ,1216 | ,3641 |
| Uncoated | 1,0048* | ,03856 | <,001 | ,8835 | 1,1260 |
| FCA | NECA | -,1810* | ,03856 | <,001 | -,3022 | -,0597 |
| NECI | -,1381* | ,03856 | ,013 | -,2593 | -,0169 |
| NECT | -,1714* | ,03856 | <,001 | -,2927 | -,0502 |
| NEEU | -,1476* | ,03856 | ,006 | -,2688 | -,0264 |
| FCI | ,1000 | ,03856 | ,197 | -,0212 | ,2212 |
| FCT | ,1429* | ,03856 | ,009 | ,0216 | ,2641 |
| FEU | ,0952 | ,03856 | ,254 | -,0260 | ,2165 |
| Uncoated | ,8571* | ,03856 | <,001 | ,7359 | ,9784 |
| FCI | NECA | -,2810* | ,03856 | <,001 | -,4022 | -,1597 |
| NECI | -,2381* | ,03856 | <,001 | -,3593 | -,1169 |
| NECT | -,2714* | ,03856 | <,001 | -,3927 | -,1502 |
| NEEU | -,2476* | ,03856 | <,001 | -,3688 | -,1264 |
| FCA | -,1000 | ,03856 | ,197 | -,2212 | ,0212 |
| FCT | ,0429 | ,03856 | ,972 | -,0784 | ,1641 |
| FEU | -,0048 | ,03856 | 1,000 | -,1260 | ,1165 |
| Uncoated | ,7571* | ,03856 | <,001 | ,6359 | ,8784 |
| FCT | NECA | -,3238* | ,03856 | <,001 | -,4450 | -,2026 |
| NECI | -,2810* | ,03856 | <,001 | -,4022 | -,1597 |
| NECT | -,3143* | ,03856 | <,001 | -,4355 | -,1931 |
| NEEU | -,2905* | ,03856 | <,001 | -,4117 | -,1693 |
| FCA | -,1429* | ,03856 | ,009 | -,2641 | -,0216 |
| FCI | -,0429 | ,03856 | ,972 | -,1641 | ,0784 |
| FEU | -,0476 | ,03856 | ,947 | -,1688 | ,0736 |
| Uncoated | ,7143* | ,03856 | <,001 | ,5931 | ,8355 |
| FEU | NECA | -,2762* | ,03856 | <,001 | -,3974 | -,1550 |
| NECI | -,2333* | ,03856 | <,001 | -,3546 | -,1121 |
| NECT | -,2667* | ,03856 | <,001 | -,3879 | -,1454 |
| NEEU | -,2429* | ,03856 | <,001 | -,3641 | -,1216 |
| FCA | -,0952 | ,03856 | ,254 | -,2165 | ,0260 |
| FCI | ,0048 | ,03856 | 1,000 | -,1165 | ,1260 |
| FCT | ,0476 | ,03856 | ,947 | -,0736 | ,1688 |
| Uncoated | ,7619* | ,03856 | <,001 | ,6407 | ,8831 |
| Uncoated | NECA | -1,0381* | ,03856 | <,001 | -1,1593 | -,9169 |
| NECI | -,9952* | ,03856 | <,001 | -1,1165 | -,8740 |
| NECT | -1,0286* | ,03856 | <,001 | -1,1498 | -,9073 |
| NEEU | -1,0048* | ,03856 | <,001 | -1,1260 | -,8835 |
| FCA | -,8571* | ,03856 | <,001 | -,9784 | -,7359 |
| FCI | -,7571* | ,03856 | <,001 | -,8784 | -,6359 |
| FCT | -,7143* | ,03856 | <,001 | -,8355 | -,5931 |
| FEU | -,7619* | ,03856 | <,001 | -,8831 | -,6407 |
| Results_Colour | NECA | NECI | -,1381* | ,03776 | ,010 | -,2568 | -,0194 |
| NECT | -,0905 | ,03776 | ,293 | -,2092 | ,0283 |
| NEEU | -,0714 | ,03776 | ,621 | -,1902 | ,0473 |
| FCA | ,2238* | ,03776 | <,001 | ,1051 | ,3425 |
| FCI | ,1667* | ,03776 | <,001 | ,0479 | ,2854 |
| FCT | ,2524* | ,03776 | <,001 | ,1336 | ,3711 |
| FEU | ,1857* | ,03776 | <,001 | ,0670 | ,3044 |
| Uncoated | 1,4286* | ,03776 | <,001 | 1,3098 | 1,5473 |
| NECI | NECA | ,1381* | ,03776 | ,010 | ,0194 | ,2568 |
| NECT | ,0476 | ,03776 | ,941 | -,0711 | ,1664 |
| NEEU | ,0667 | ,03776 | ,705 | -,0521 | ,1854 |
| FCA | ,3619* | ,03776 | <,001 | ,2432 | ,4806 |
| FCI | ,3048* | ,03776 | <,001 | ,1860 | ,4235 |
| FCT | ,3905* | ,03776 | <,001 | ,2717 | ,5092 |
| FEU | ,3238* | ,03776 | <,001 | ,2051 | ,4425 |
| Uncoated | 1,5667* | ,03776 | <,001 | 1,4479 | 1,6854 |
| NECT | NECA | ,0905 | ,03776 | ,293 | -,0283 | ,2092 |
| NECI | -,0476 | ,03776 | ,941 | -,1664 | ,0711 |
| NEEU | ,0190 | ,03776 | 1,000 | -,0997 | ,1378 |
| FCA | ,3143* | ,03776 | <,001 | ,1956 | ,4330 |
| FCI | ,2571* | ,03776 | <,001 | ,1384 | ,3759 |
| FCT | ,3429* | ,03776 | <,001 | ,2241 | ,4616 |
| FEU | ,2762* | ,03776 | <,001 | ,1575 | ,3949 |
| Uncoated | 1,5190* | ,03776 | <,001 | 1,4003 | 1,6378 |
| NEEU | NECA | ,0714 | ,03776 | ,621 | -,0473 | ,1902 |
| NECI | -,0667 | ,03776 | ,705 | -,1854 | ,0521 |
| NECT | -,0190 | ,03776 | 1,000 | -,1378 | ,0997 |
| FCA | ,2952* | ,03776 | <,001 | ,1765 | ,4140 |
| FCI | ,2381* | ,03776 | <,001 | ,1194 | ,3568 |
| FCT | ,3238* | ,03776 | <,001 | ,2051 | ,4425 |
| FEU | ,2571* | ,03776 | <,001 | ,1384 | ,3759 |
| Uncoated | 1,5000* | ,03776 | <,001 | 1,3813 | 1,6187 |
| FCA | NECA | -,2238* | ,03776 | <,001 | -,3425 | -,1051 |
| NECI | -,3619* | ,03776 | <,001 | -,4806 | -,2432 |
| NECT | -,3143* | ,03776 | <,001 | -,4330 | -,1956 |
| NEEU | -,2952* | ,03776 | <,001 | -,4140 | -,1765 |
| FCI | -,0571 | ,03776 | ,848 | -,1759 | ,0616 |
| FCT | ,0286 | ,03776 | ,998 | -,0902 | ,1473 |
| FEU | -,0381 | ,03776 | ,985 | -,1568 | ,0806 |
| Uncoated | 1,2048* | ,03776 | <,001 | 1,0860 | 1,3235 |
| FCI | NECA | -,1667* | ,03776 | <,001 | -,2854 | -,0479 |
| NECI | -,3048* | ,03776 | <,001 | -,4235 | -,1860 |
| NECT | -,2571* | ,03776 | <,001 | -,3759 | -,1384 |
| NEEU | -,2381* | ,03776 | <,001 | -,3568 | -,1194 |
| FCA | ,0571 | ,03776 | ,848 | -,0616 | ,1759 |
| FCT | ,0857 | ,03776 | ,367 | -,0330 | ,2044 |
| FEU | ,0190 | ,03776 | 1,000 | -,0997 | ,1378 |
| Uncoated | 1,2619* | ,03776 | <,001 | 1,1432 | 1,3806 |
| FCT | NECA | -,2524* | ,03776 | <,001 | -,3711 | -,1336 |
| NECI | -,3905* | ,03776 | <,001 | -,5092 | -,2717 |
| NECT | -,3429* | ,03776 | <,001 | -,4616 | -,2241 |
| NEEU | -,3238* | ,03776 | <,001 | -,4425 | -,2051 |
| FCA | -,0286 | ,03776 | ,998 | -,1473 | ,0902 |
| FCI | -,0857 | ,03776 | ,367 | -,2044 | ,0330 |
| FEU | -,0667 | ,03776 | ,705 | -,1854 | ,0521 |
| Uncoated | 1,1762* | ,03776 | <,001 | 1,0575 | 1,2949 |
| FEU | NECA | -,1857* | ,03776 | <,001 | -,3044 | -,0670 |
| NECI | -,3238* | ,03776 | <,001 | -,4425 | -,2051 |
| NECT | -,2762* | ,03776 | <,001 | -,3949 | -,1575 |
| NEEU | -,2571* | ,03776 | <,001 | -,3759 | -,1384 |
| FCA | ,0381 | ,03776 | ,985 | -,0806 | ,1568 |
| FCI | -,0190 | ,03776 | 1,000 | -,1378 | ,0997 |
| FCT | ,0667 | ,03776 | ,705 | -,0521 | ,1854 |
| Uncoated | 1,2429* | ,03776 | <,001 | 1,1241 | 1,3616 |
| Uncoated | NECA | -1,4286* | ,03776 | <,001 | -1,5473 | -1,3098 |
| NECI | -1,5667* | ,03776 | <,001 | -1,6854 | -1,4479 |
| NECT | -1,5190* | ,03776 | <,001 | -1,6378 | -1,4003 |
| NEEU | -1,5000* | ,03776 | <,001 | -1,6187 | -1,3813 |
| FCA | -1,2048* | ,03776 | <,001 | -1,3235 | -1,0860 |
| FCI | -1,2619* | ,03776 | <,001 | -1,3806 | -1,1432 |
| FCT | -1,1762* | ,03776 | <,001 | -1,2949 | -1,0575 |
| FEU | -1,2429* | ,03776 | <,001 | -1,3616 | -1,1241 |
| Results_Texture | NECA | NECI | -,1286* | ,03017 | ,001 | -,2234 | -,0337 |
| NECT | -,0762 | ,03017 | ,228 | -,1711 | ,0187 |
| NEEU | -,0810 | ,03017 | ,162 | -,1758 | ,0139 |
| FCA | ,2381* | ,03017 | <,001 | ,1432 | ,3330 |
| FCI | ,1905* | ,03017 | <,001 | ,0956 | ,2853 |
| FCT | ,2714* | ,03017 | <,001 | ,1766 | ,3663 |
| FEU | ,2190* | ,03017 | <,001 | ,1242 | ,3139 |
| Uncoated | 1,6429* | ,03017 | <,001 | 1,5480 | 1,7377 |
| NECI | NECA | ,1286* | ,03017 | ,001 | ,0337 | ,2234 |
| NECT | ,0524 | ,03017 | ,723 | -,0425 | ,1472 |
| NEEU | ,0476 | ,03017 | ,815 | -,0472 | ,1425 |
| FCA | ,3667* | ,03017 | <,001 | ,2718 | ,4615 |
| FCI | ,3190* | ,03017 | <,001 | ,2242 | ,4139 |
| FCT | ,4000* | ,03017 | <,001 | ,3051 | ,4949 |
| FEU | ,3476* | ,03017 | <,001 | ,2528 | ,4425 |
| Uncoated | 1,7714* | ,03017 | <,001 | 1,6766 | 1,8663 |
| NECT | NECA | ,0762 | ,03017 | ,228 | -,0187 | ,1711 |
| NECI | -,0524 | ,03017 | ,723 | -,1472 | ,0425 |
| NEEU | -,0048 | ,03017 | 1,000 | -,0996 | ,0901 |
| FCA | ,3143* | ,03017 | <,001 | ,2194 | ,4092 |
| FCI | ,2667* | ,03017 | <,001 | ,1718 | ,3615 |
| FCT | ,3476* | ,03017 | <,001 | ,2528 | ,4425 |
| FEU | ,2952* | ,03017 | <,001 | ,2004 | ,3901 |
| Uncoated | 1,7190* | ,03017 | <,001 | 1,6242 | 1,8139 |
| NEEU | NECA | ,0810 | ,03017 | ,162 | -,0139 | ,1758 |
| NECI | -,0476 | ,03017 | ,815 | -,1425 | ,0472 |
| NECT | ,0048 | ,03017 | 1,000 | -,0901 | ,0996 |
| FCA | ,3190* | ,03017 | <,001 | ,2242 | ,4139 |
| FCI | ,2714* | ,03017 | <,001 | ,1766 | ,3663 |
| FCT | ,3524* | ,03017 | <,001 | ,2575 | ,4472 |
| FEU | ,3000* | ,03017 | <,001 | ,2051 | ,3949 |
| Uncoated | 1,7238* | ,03017 | <,001 | 1,6289 | 1,8187 |
| FCA | NECA | -,2381* | ,03017 | <,001 | -,3330 | -,1432 |
| NECI | -,3667* | ,03017 | <,001 | -,4615 | -,2718 |
| NECT | -,3143* | ,03017 | <,001 | -,4092 | -,2194 |
| NEEU | -,3190* | ,03017 | <,001 | -,4139 | -,2242 |
| FCI | -,0476 | ,03017 | ,815 | -,1425 | ,0472 |
| FCT | ,0333 | ,03017 | ,973 | -,0615 | ,1282 |
| FEU | -,0190 | ,03017 | ,999 | -,1139 | ,0758 |
| Uncoated | 1,4048* | ,03017 | <,001 | 1,3099 | 1,4996 |
| FCI | NECA | -,1905* | ,03017 | <,001 | -,2853 | -,0956 |
| NECI | -,3190* | ,03017 | <,001 | -,4139 | -,2242 |
| NECT | -,2667* | ,03017 | <,001 | -,3615 | -,1718 |
| NEEU | -,2714* | ,03017 | <,001 | -,3663 | -,1766 |
| FCA | ,0476 | ,03017 | ,815 | -,0472 | ,1425 |
| FCT | ,0810 | ,03017 | ,162 | -,0139 | ,1758 |
| FEU | ,0286 | ,03017 | ,990 | -,0663 | ,1234 |
| Uncoated | 1,4524* | ,03017 | <,001 | 1,3575 | 1,5472 |
| FCT | NECA | -,2714* | ,03017 | <,001 | -,3663 | -,1766 |
| NECI | -,4000* | ,03017 | <,001 | -,4949 | -,3051 |
| NECT | -,3476* | ,03017 | <,001 | -,4425 | -,2528 |
| NEEU | -,3524* | ,03017 | <,001 | -,4472 | -,2575 |
| FCA | -,0333 | ,03017 | ,973 | -,1282 | ,0615 |
| FCI | -,0810 | ,03017 | ,162 | -,1758 | ,0139 |
| FEU | -,0524 | ,03017 | ,723 | -,1472 | ,0425 |
| Uncoated | 1,3714* | ,03017 | <,001 | 1,2766 | 1,4663 |
| FEU | NECA | -,2190* | ,03017 | <,001 | -,3139 | -,1242 |
| NECI | -,3476* | ,03017 | <,001 | -,4425 | -,2528 |
| NECT | -,2952* | ,03017 | <,001 | -,3901 | -,2004 |
| NEEU | -,3000* | ,03017 | <,001 | -,3949 | -,2051 |
| FCA | ,0190 | ,03017 | ,999 | -,0758 | ,1139 |
| FCI | -,0286 | ,03017 | ,990 | -,1234 | ,0663 |
| FCT | ,0524 | ,03017 | ,723 | -,0425 | ,1472 |
| Uncoated | 1,4238* | ,03017 | <,001 | 1,3289 | 1,5187 |
| Uncoated | NECA | -1,6429* | ,03017 | <,001 | -1,7377 | -1,5480 |
| NECI | -1,7714* | ,03017 | <,001 | -1,8663 | -1,6766 |
| NECT | -1,7190* | ,03017 | <,001 | -1,8139 | -1,6242 |
| NEEU | -1,7238* | ,03017 | <,001 | -1,8187 | -1,6289 |
| FCA | -1,4048* | ,03017 | <,001 | -1,4996 | -1,3099 |
| FCI | -1,4524* | ,03017 | <,001 | -1,5472 | -1,3575 |
| FCT | -1,3714* | ,03017 | <,001 | -1,4663 | -1,2766 |
| FEU | -1,4238* | ,03017 | <,001 | -1,5187 | -1,3289 |
| Based on observed means.  The error term is Mean Square(Error) = ,010. | | | | | | | |
| *. The mean difference is significant at the ,05 level. | | | | | | | |
